# Supplementary material for: Synthesis of β-C-galactosyl d- and l-alanines
Source: Royal Society of Chemistry journal article supplement (doi:10.1039/c2ob26078f), 2012-01-01

Electronic supplementary information (ESI)

**Synthesis of  $\beta$ -C-Galactosyl D- and L-Alanines**

V. Narasimharao Thota,<sup>a</sup> Jacquelyn Gervay-Hague<sup>b</sup> and Suvarn S. Kulkarni\*<sup>a</sup>

<sup>a</sup>*Department of Chemistry, Indian Institute of Technology Bombay, Mumbai 400076, India*

<sup>b</sup>*Department of Chemistry, University of California, Davis, One Shields Avenue, Davis,  
California 95616*

[suvarn@chem.iitb.ac.in](mailto:suvarn@chem.iitb.ac.in)

*(Dedicated to Prof. M. S. Wadia on the occasion of his 75<sup>th</sup> birthday)*

| <b>Table of Contents</b>                                                 | <b>Pages</b> |
|--------------------------------------------------------------------------|--------------|
| List of Contents.....                                                    | S1-S2.       |
| <sup>1</sup> H NMR spectrum of compound <b>6</b> .....                   | S3.          |
| <sup>13</sup> C NMR spectrum of compound <b>6</b> .....                  | S4.          |
| <sup>1</sup> H NMR spectrum of compound <b>7</b> .....                   | S5.          |
| <sup>13</sup> C NMR spectrum of compound <b>7</b> .....                  | S6.          |
| <sup>1</sup> H NMR spectrum of compound <b>8</b> .....                   | S7.          |
| <sup>13</sup> C NMR spectrum of compound <b>8</b> .....                  | S8.          |
| <sup>1</sup> H NMR spectrum of compound <b>9</b> .....                   | S9.          |
| <sup>13</sup> C NMR spectrum of compound <b>9</b> .....                  | S10.         |
| <sup>1</sup> H- <sup>1</sup> H COSY spectrum of compound <b>9</b> .....  | S11.         |
| NOESY spectrum of compound <b>9</b> .....                                | S12.         |
| <sup>1</sup> H NMR spectrum of compound <b>10</b> .....                  | S13.         |
| <sup>13</sup> C NMR spectrum of compound <b>10</b> .....                 | S14.         |
| <sup>1</sup> H- <sup>1</sup> H COSY spectrum of compound <b>10</b> ..... | S15.         |
| NOESY spectrum of compound <b>10</b> .....                               | S16.         |

|                                                                         |      |
|-------------------------------------------------------------------------|------|
| <sup>1</sup> H NMR spectrum of compound <b>13</b> .....                 | S17. |
| <sup>13</sup> C NMR spectrum of compound <b>13</b> .....                | S18. |
| <sup>1</sup> H NMR spectrum of compound <b>14</b> .....                 | S19. |
| <sup>13</sup> C NMR spectrum of compound <b>14</b> .....                | S20. |
| <sup>1</sup> H NMR spectrum of compound <b>15</b> .....                 | S21. |
| <sup>13</sup> C NMR spectrum of compound <b>15</b> .....                | S22. |
| <sup>1</sup> H NMR spectrum of compound <b>16</b> .....                 | S23. |
| <sup>13</sup> C NMR spectrum of compound <b>16</b> .....                | S24. |
| <sup>1</sup> H NMR spectrum of compound <b>1a</b> .....                 | S25. |
| <sup>13</sup> C NMR spectrum of compound <b>1a</b> .....                | S26. |
| <sup>1</sup> H NMR spectrum of per-acetate of compound <b>1a</b> .....  | S27. |
| <sup>13</sup> C NMR spectrum of per-acetate of compound <b>1a</b> ..... | S28. |
| <sup>1</sup> H NMR spectrum of compound <b>17</b> .....                 | S29. |
| <sup>13</sup> C NMR spectrum of compound <b>17</b> .....                | S30. |
| <sup>1</sup> H NMR spectrum of compound <b>18</b> .....                 | S31. |
| <sup>13</sup> C NMR spectrum of compound <b>18</b> .....                | S32. |
| <sup>1</sup> H NMR spectrum of compound <b>19</b> .....                 | S33. |
| <sup>13</sup> C NMR spectrum of compound <b>19</b> .....                | S34. |
| <sup>1</sup> H NMR spectrum of compound <b>20</b> .....                 | S35. |
| <sup>13</sup> C NMR spectrum of compound <b>20</b> .....                | S36. |
| <sup>1</sup> H NMR spectrum of compound <b>1b</b> .....                 | S37. |
| <sup>13</sup> C NMR spectrum of compound <b>1b</b> .....                | S38. |
| <sup>1</sup> H NMR spectrum of per-acetate of compound <b>1b</b> .....  | S39. |
| <sup>13</sup> C NMR spectrum of per-acetate of compound <b>1b</b> ..... | S40. |

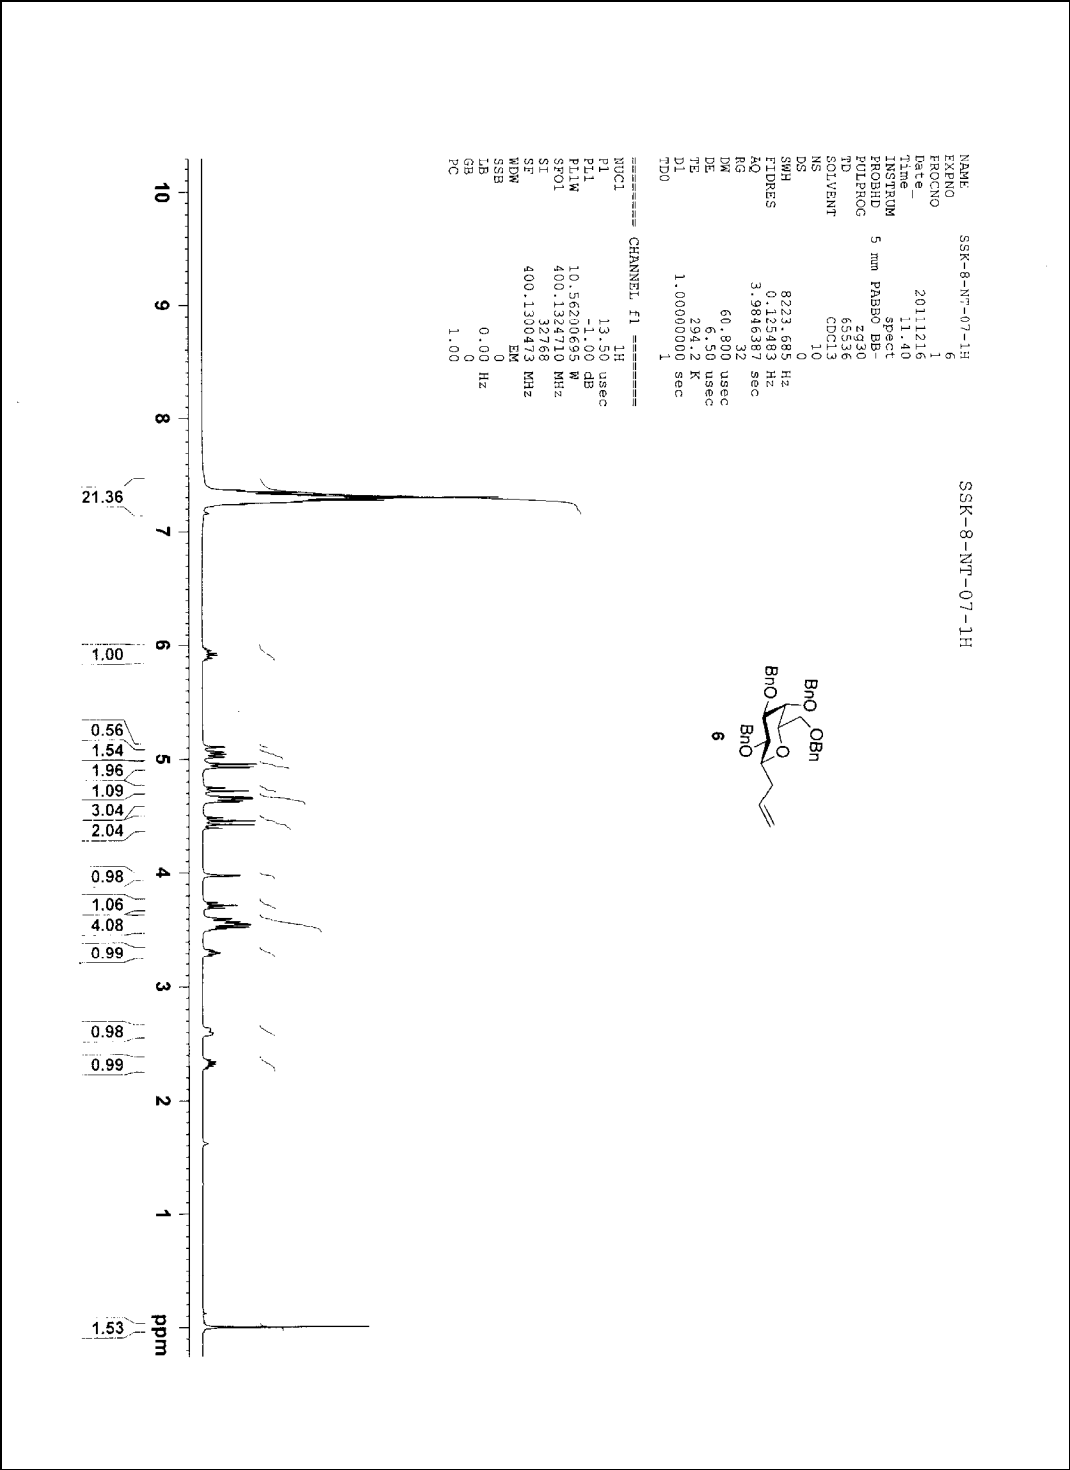

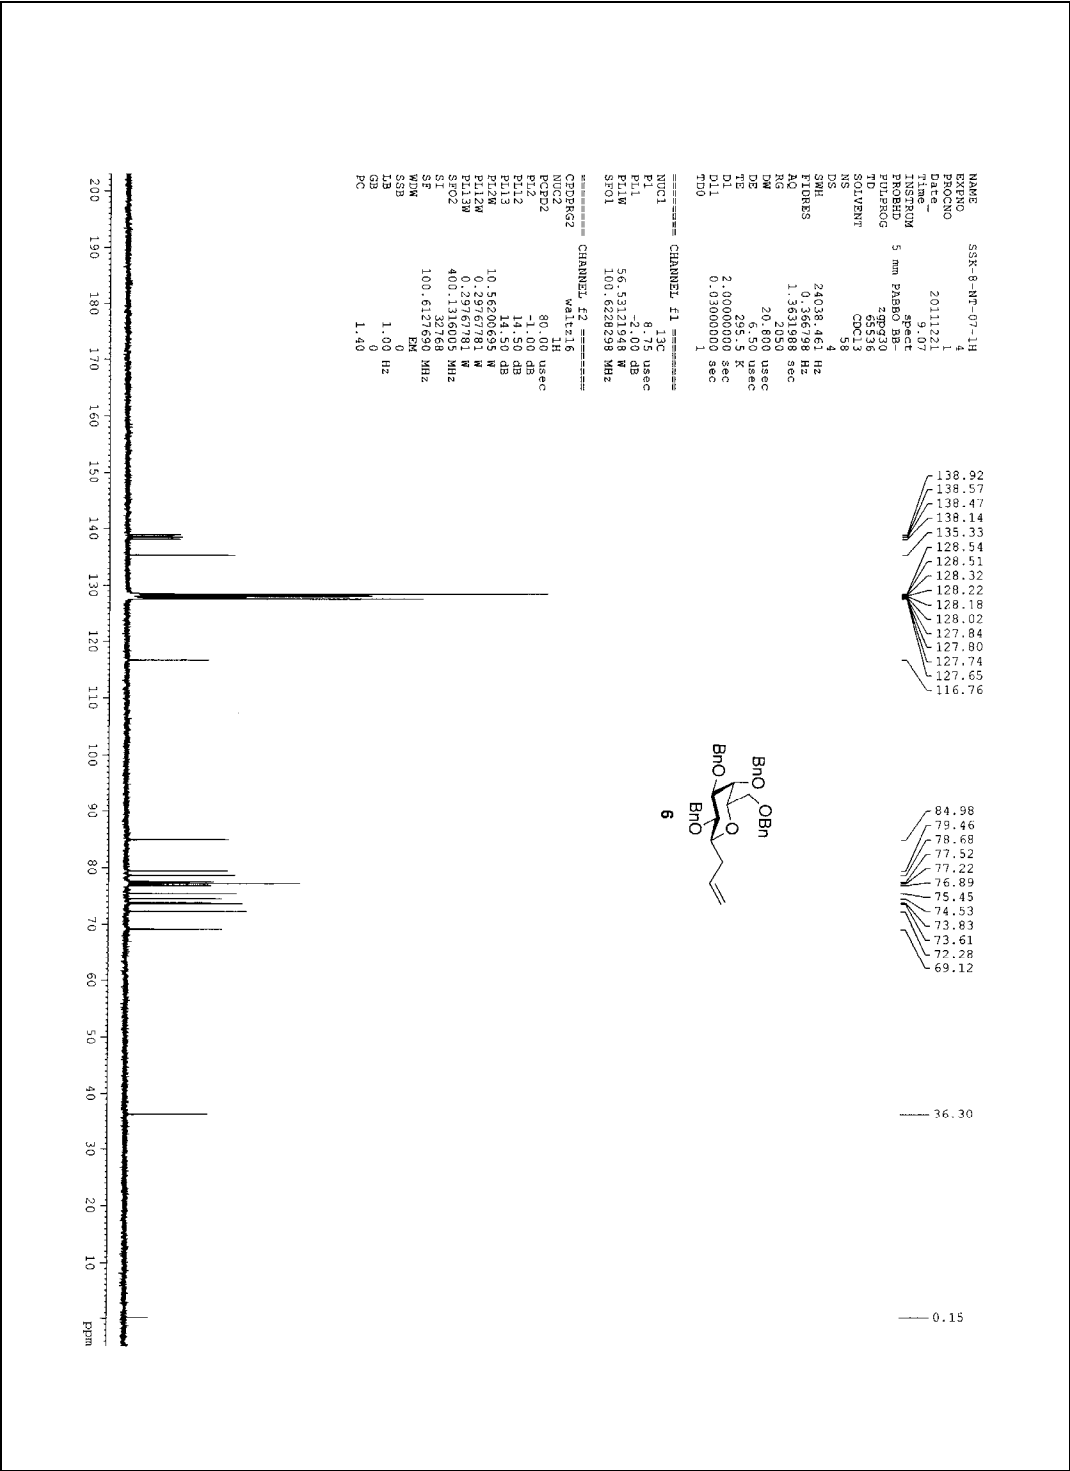

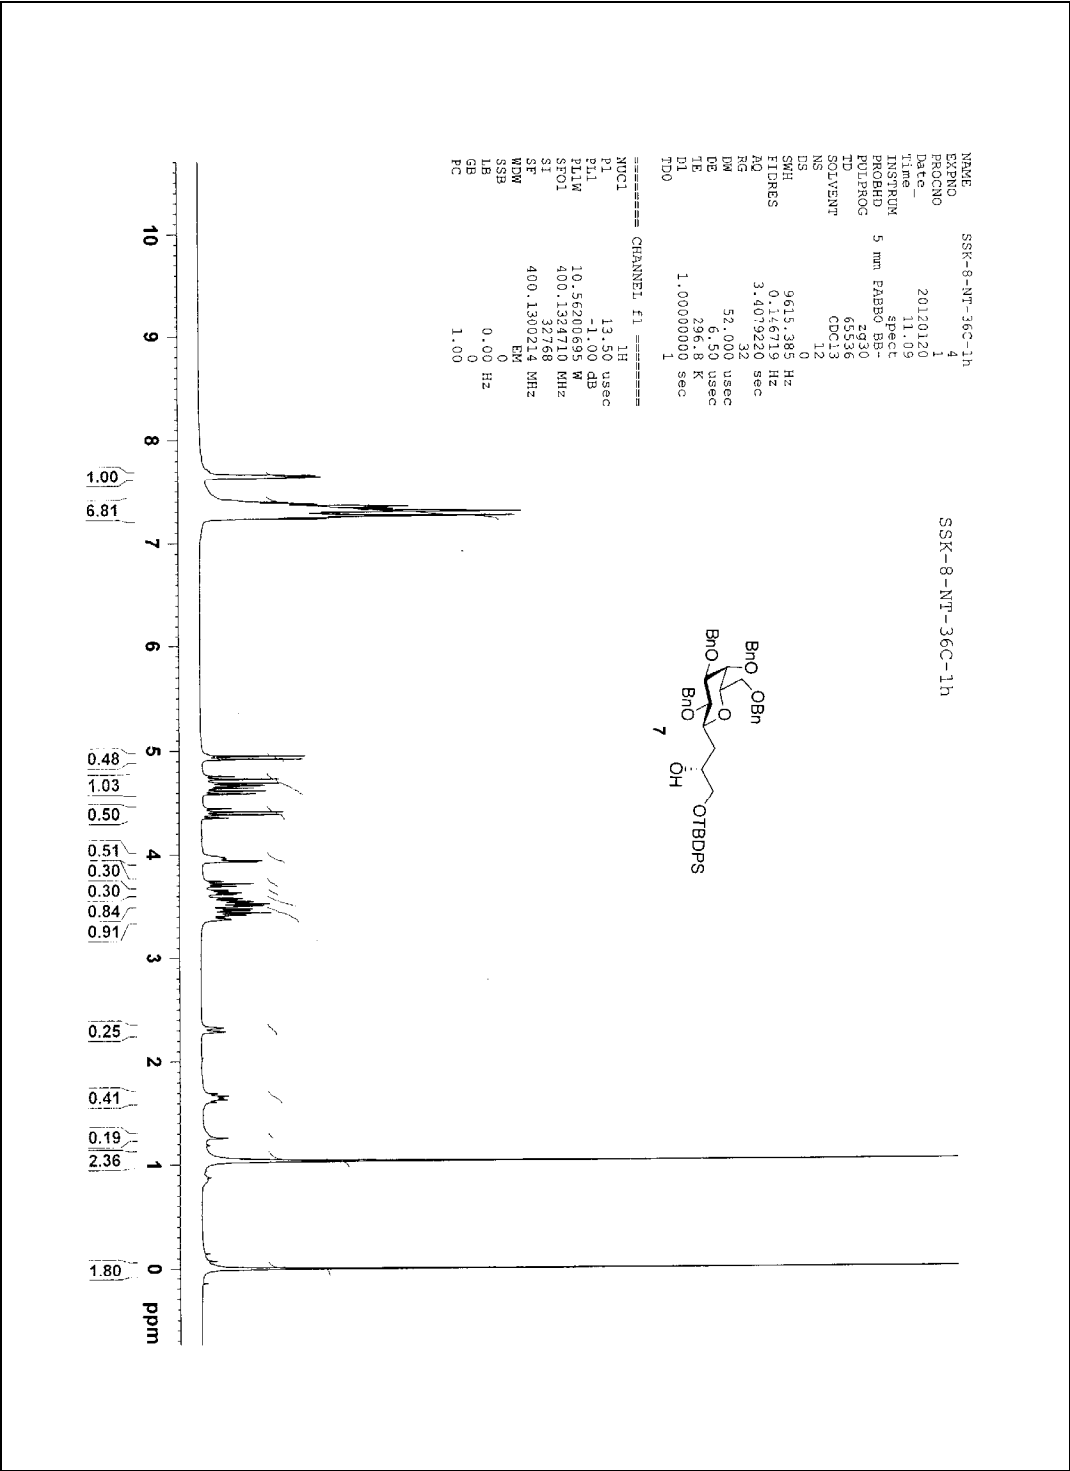

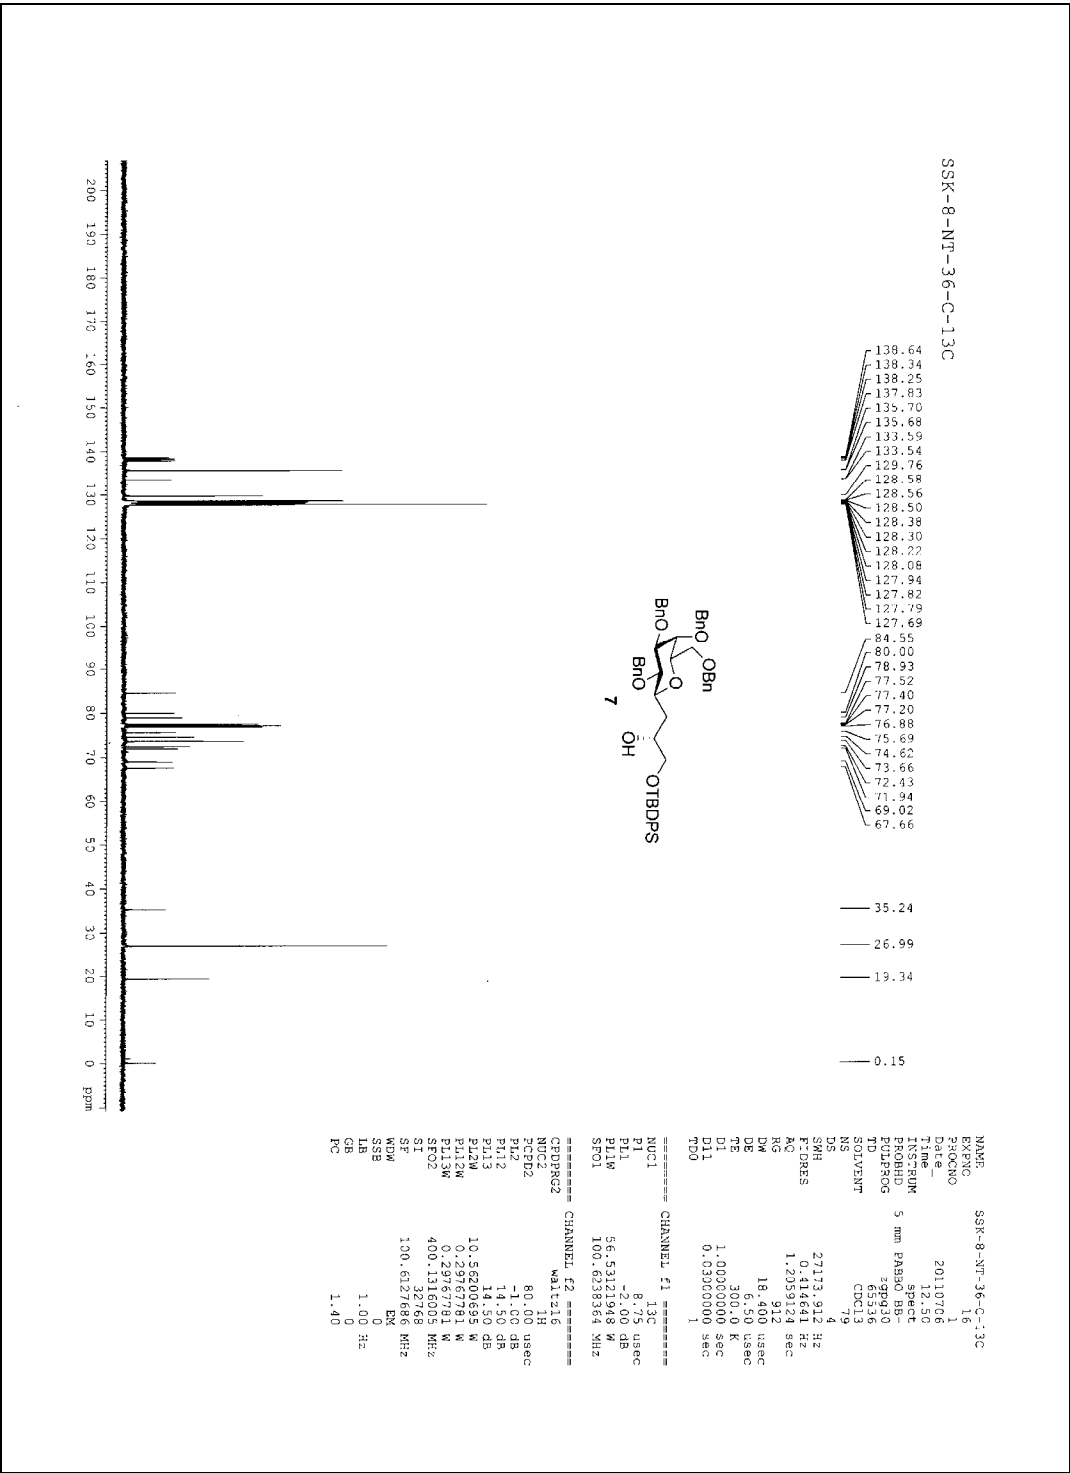

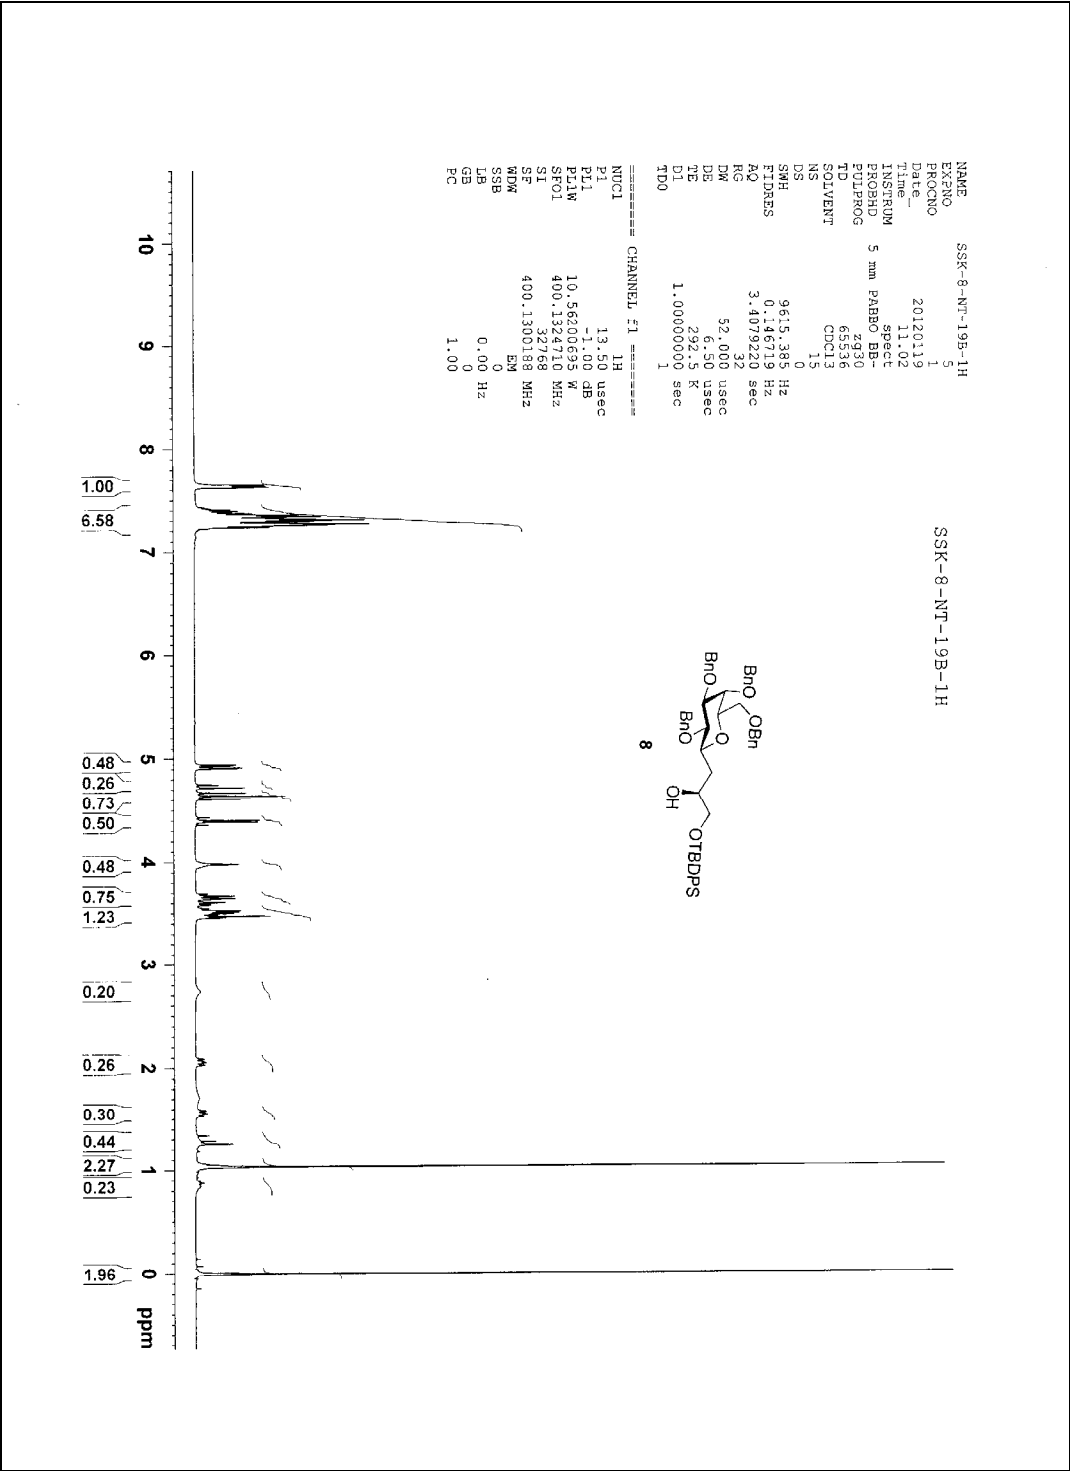

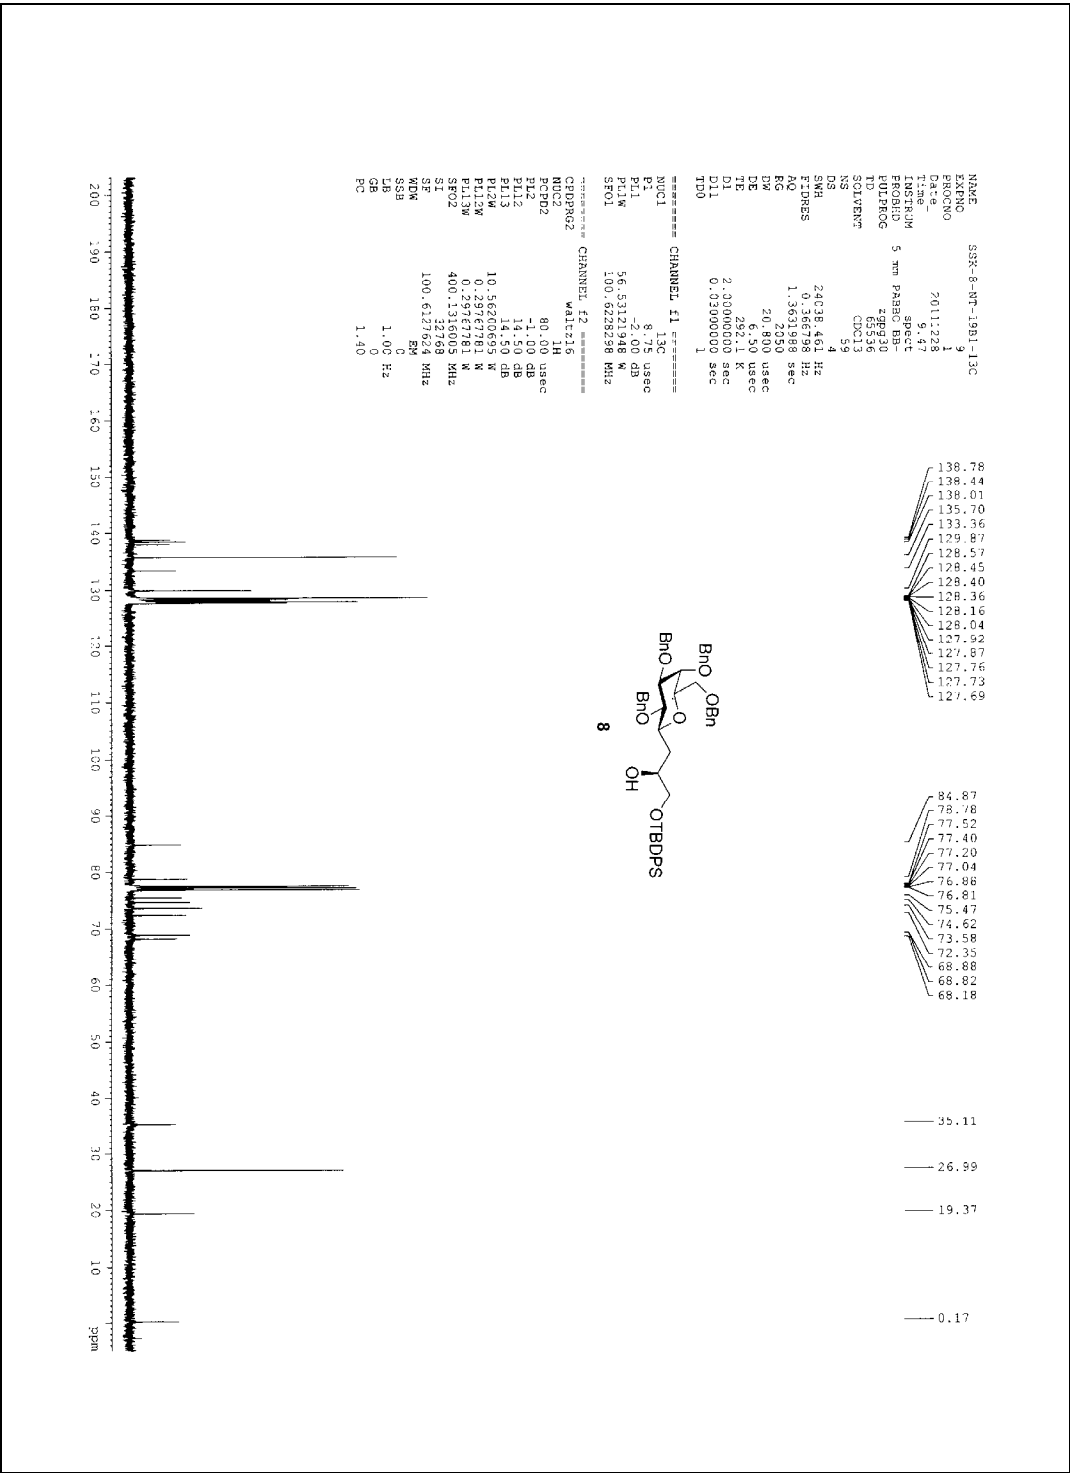



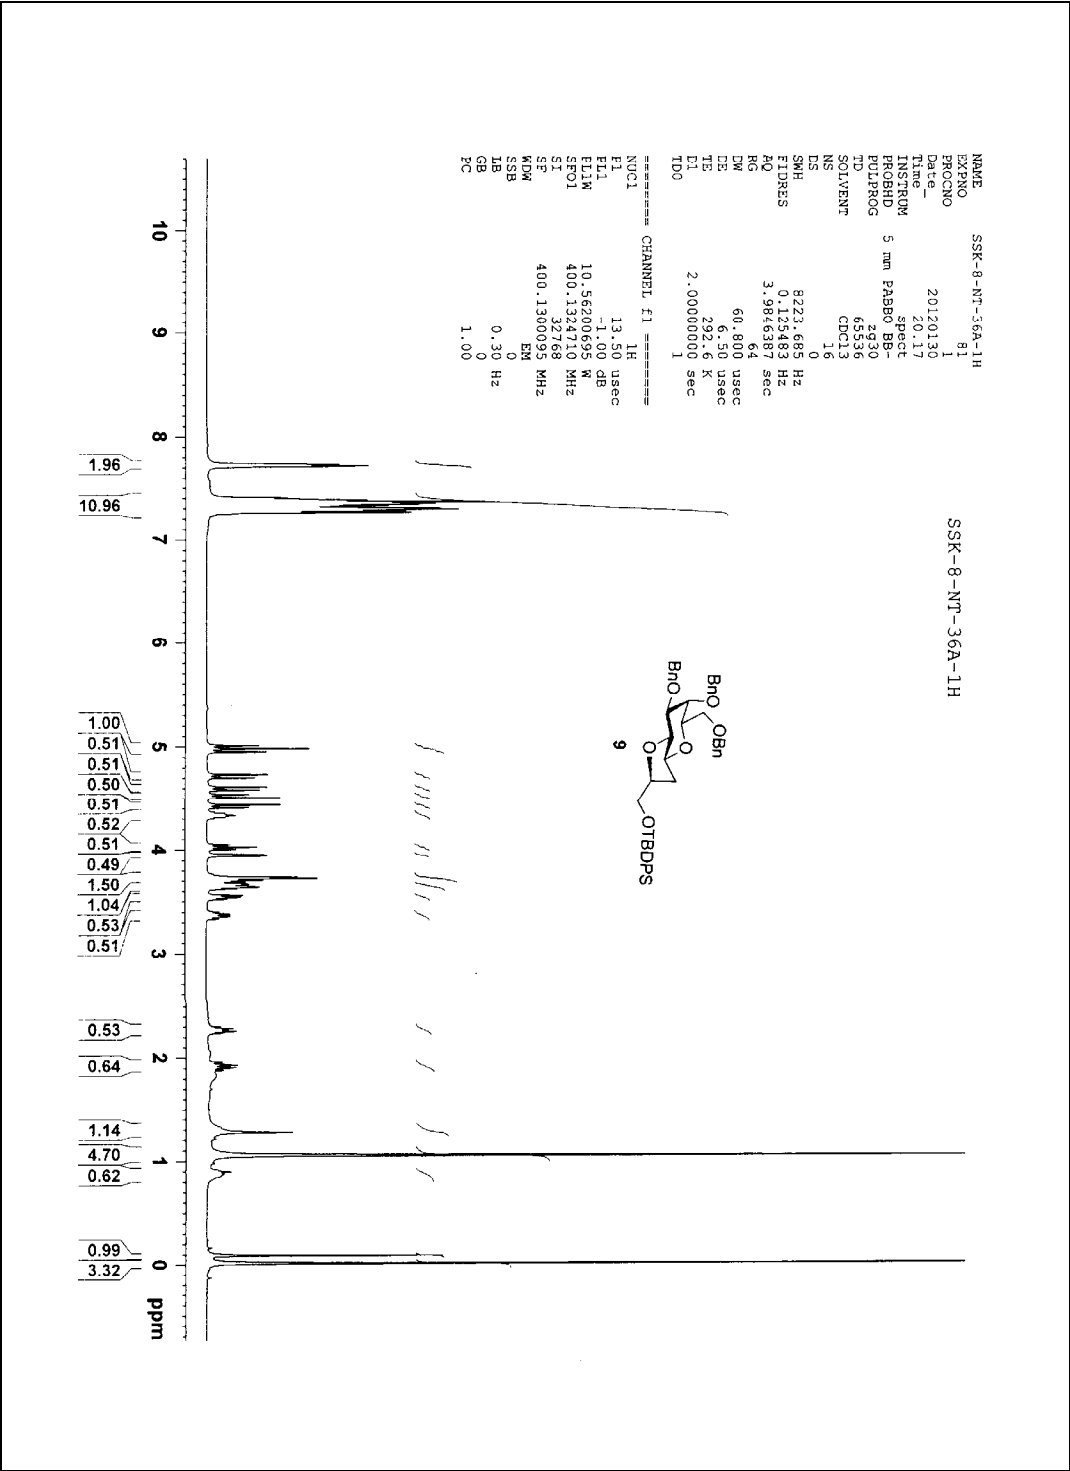

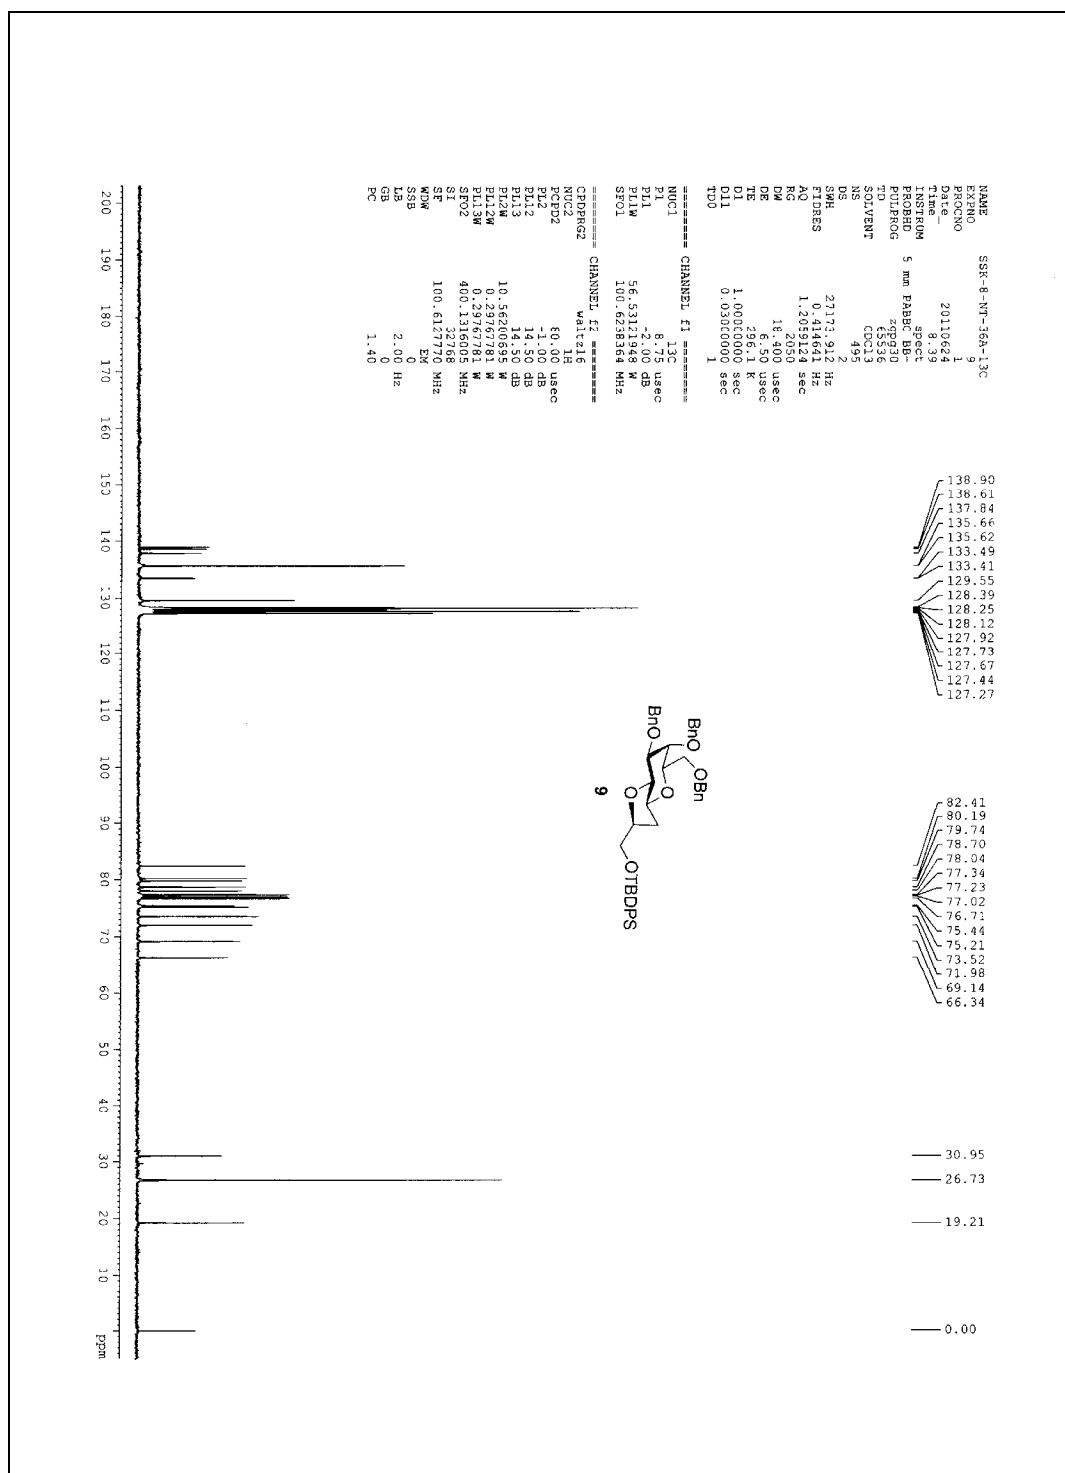

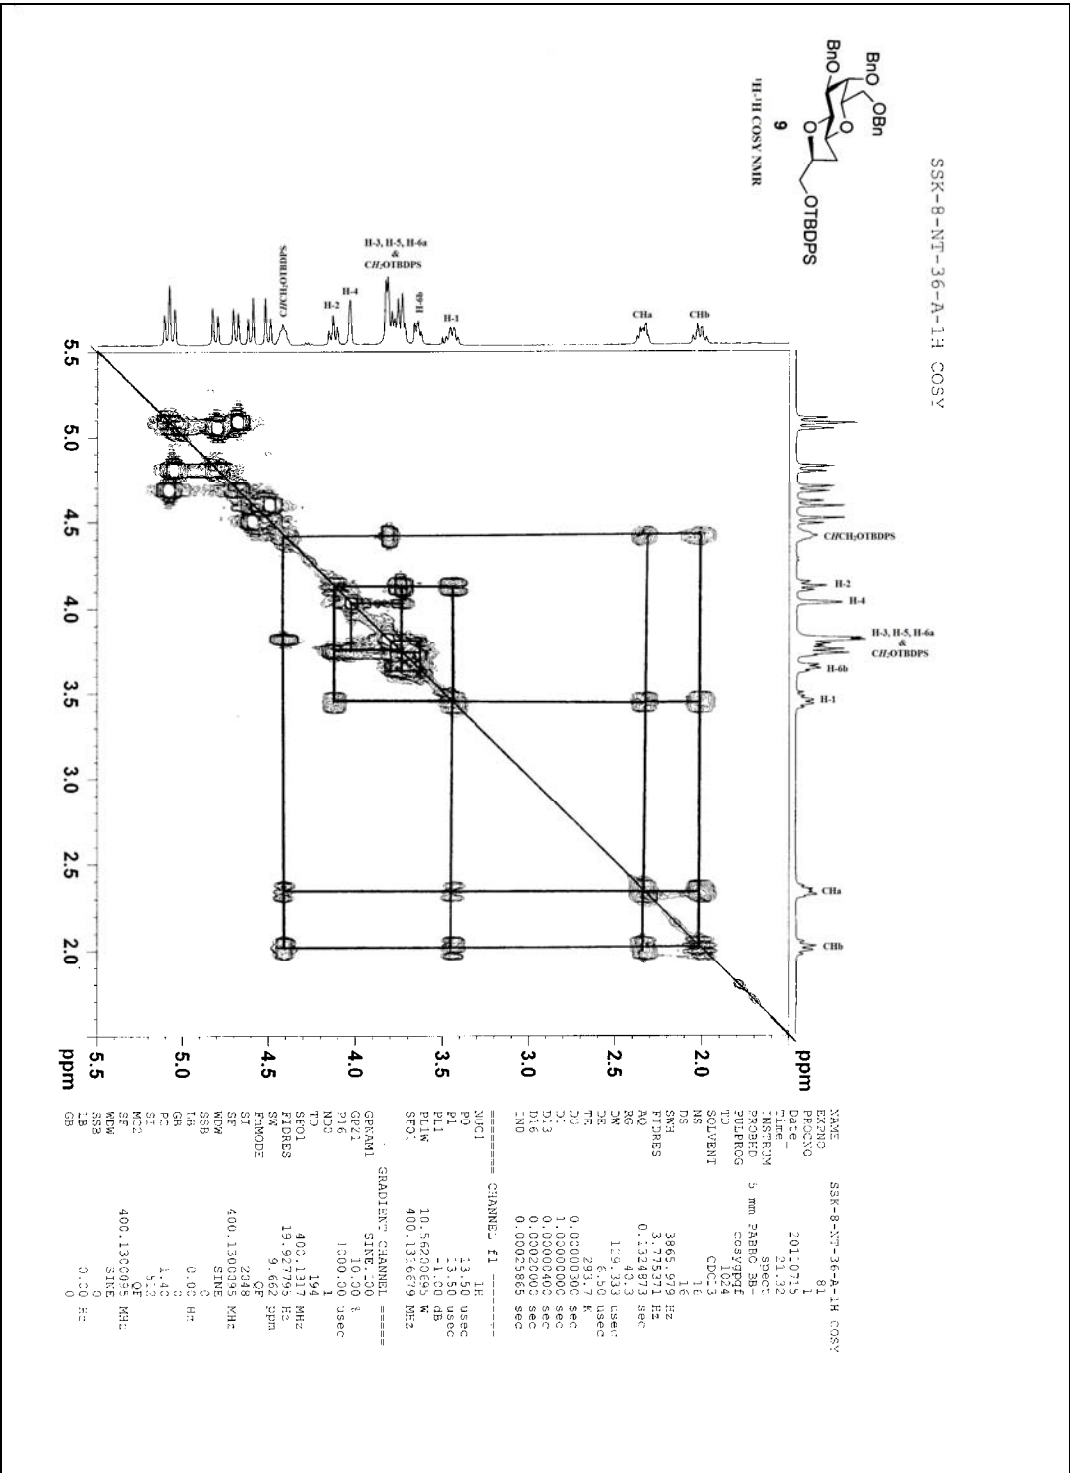

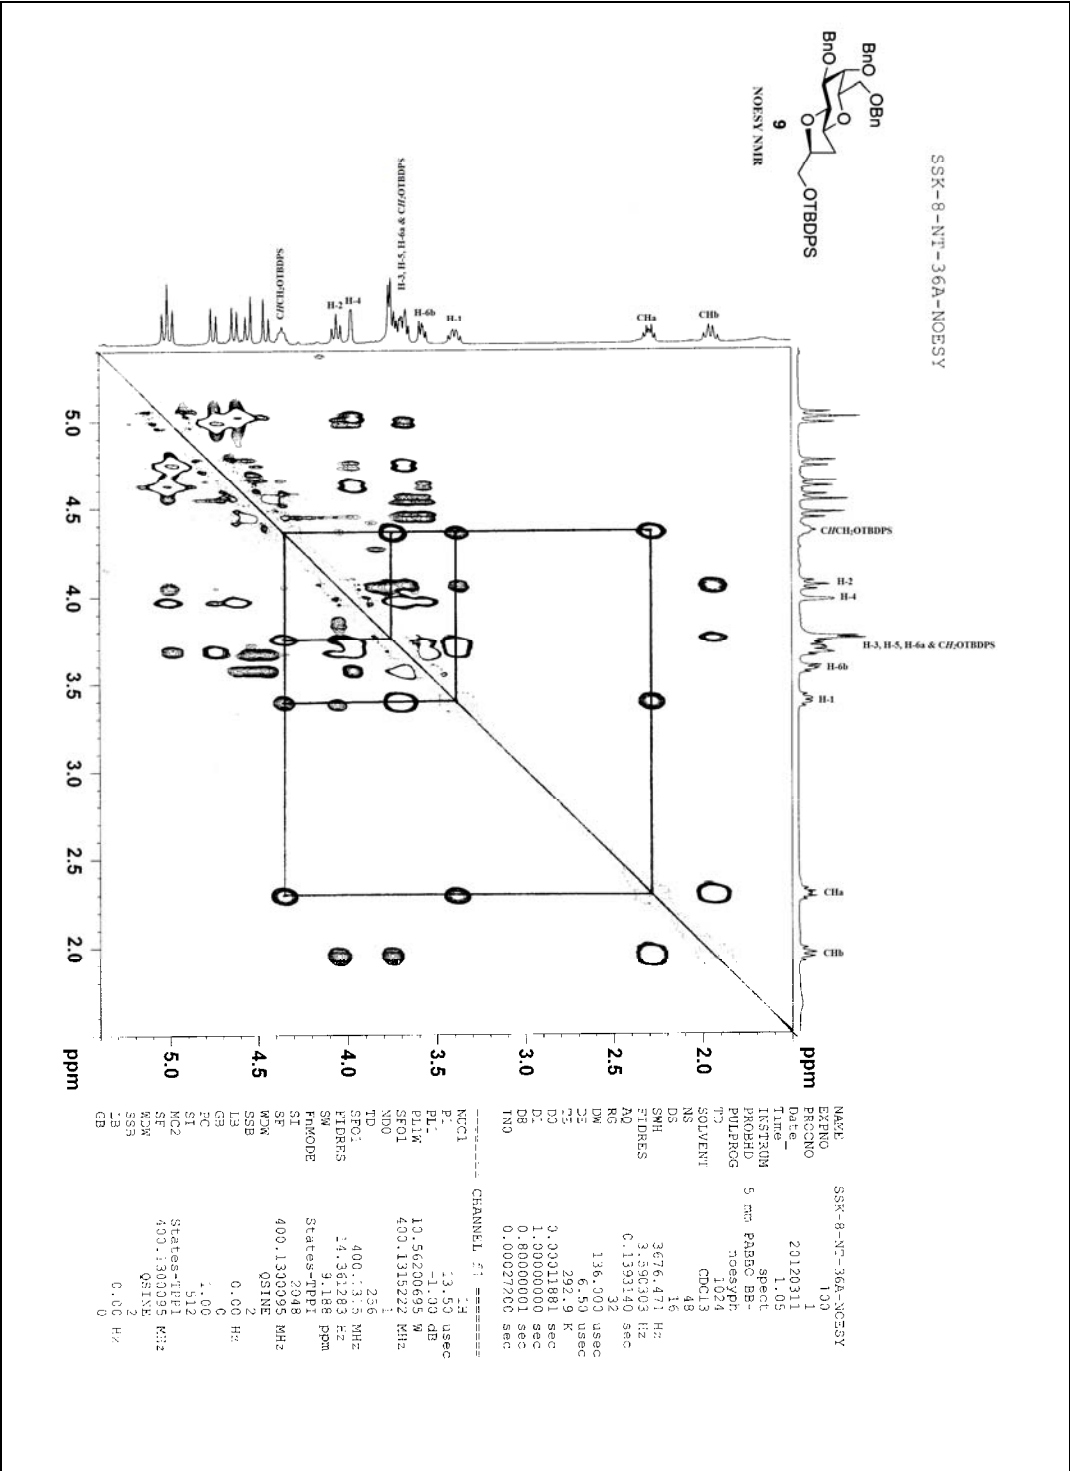

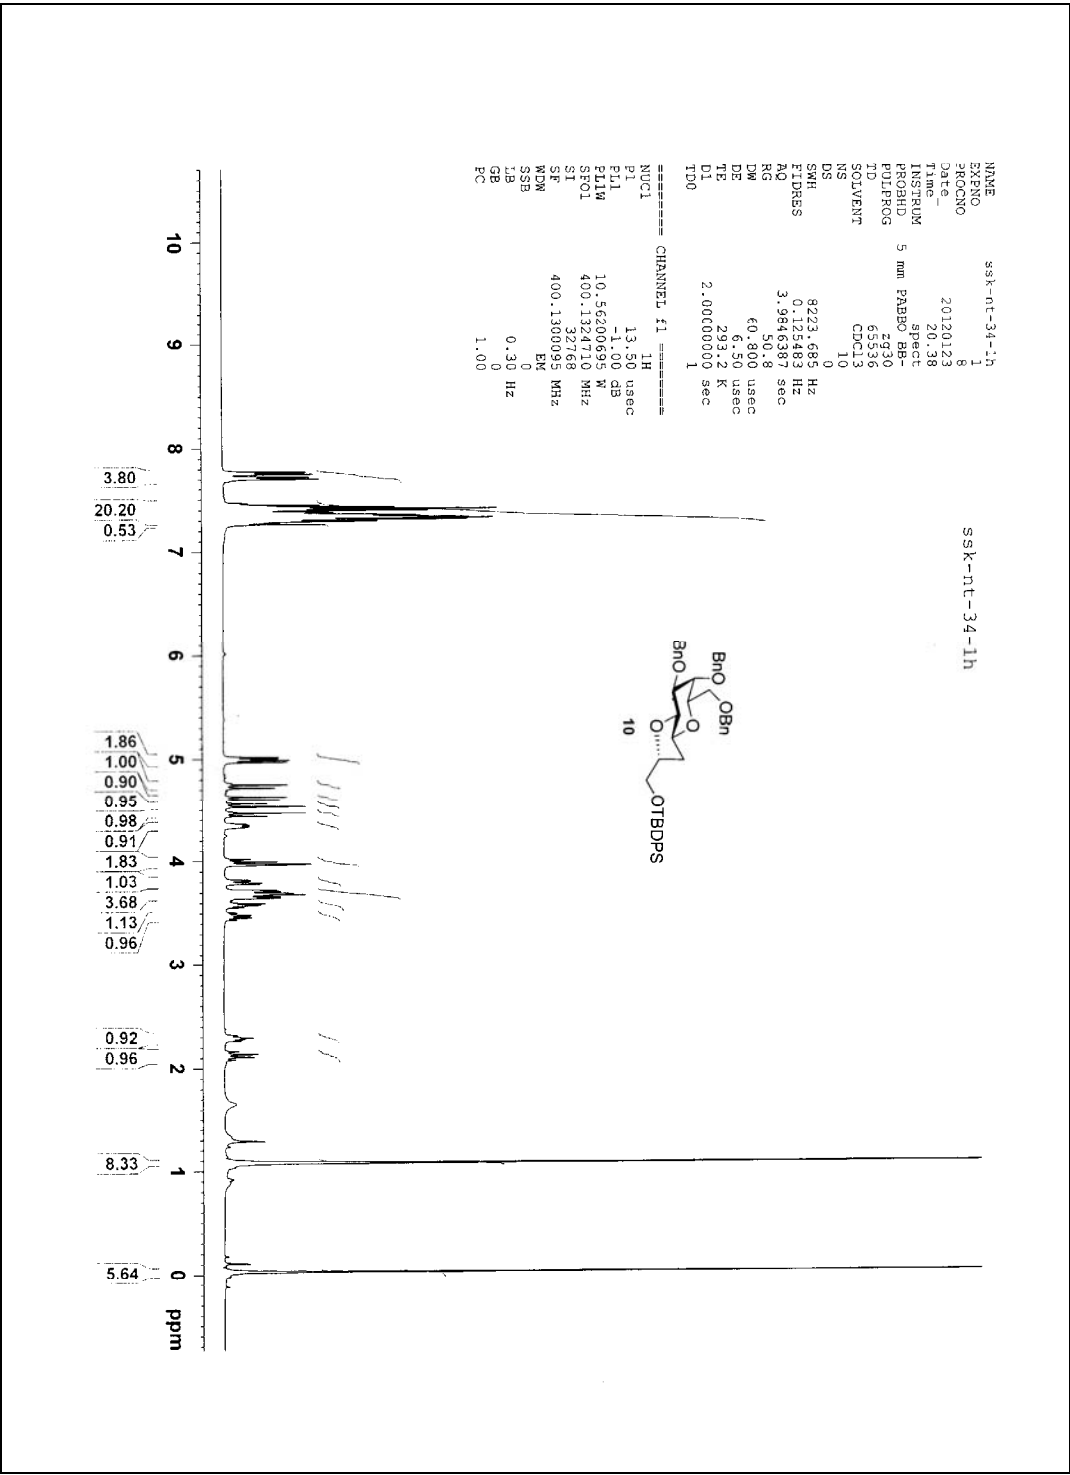

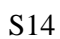

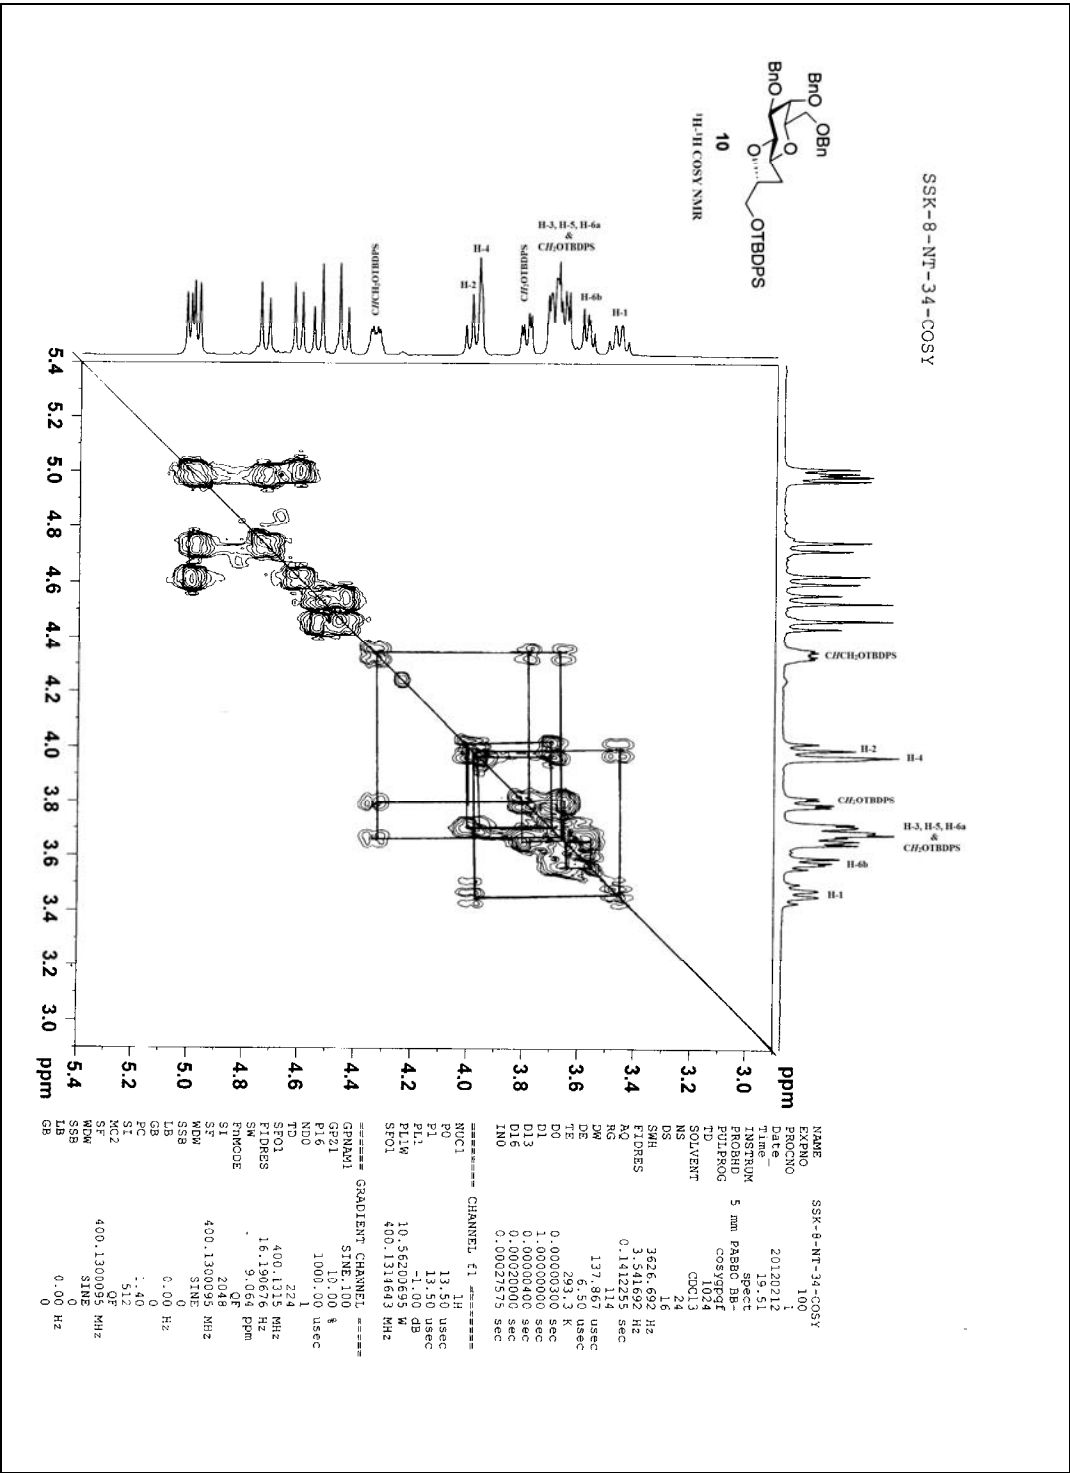

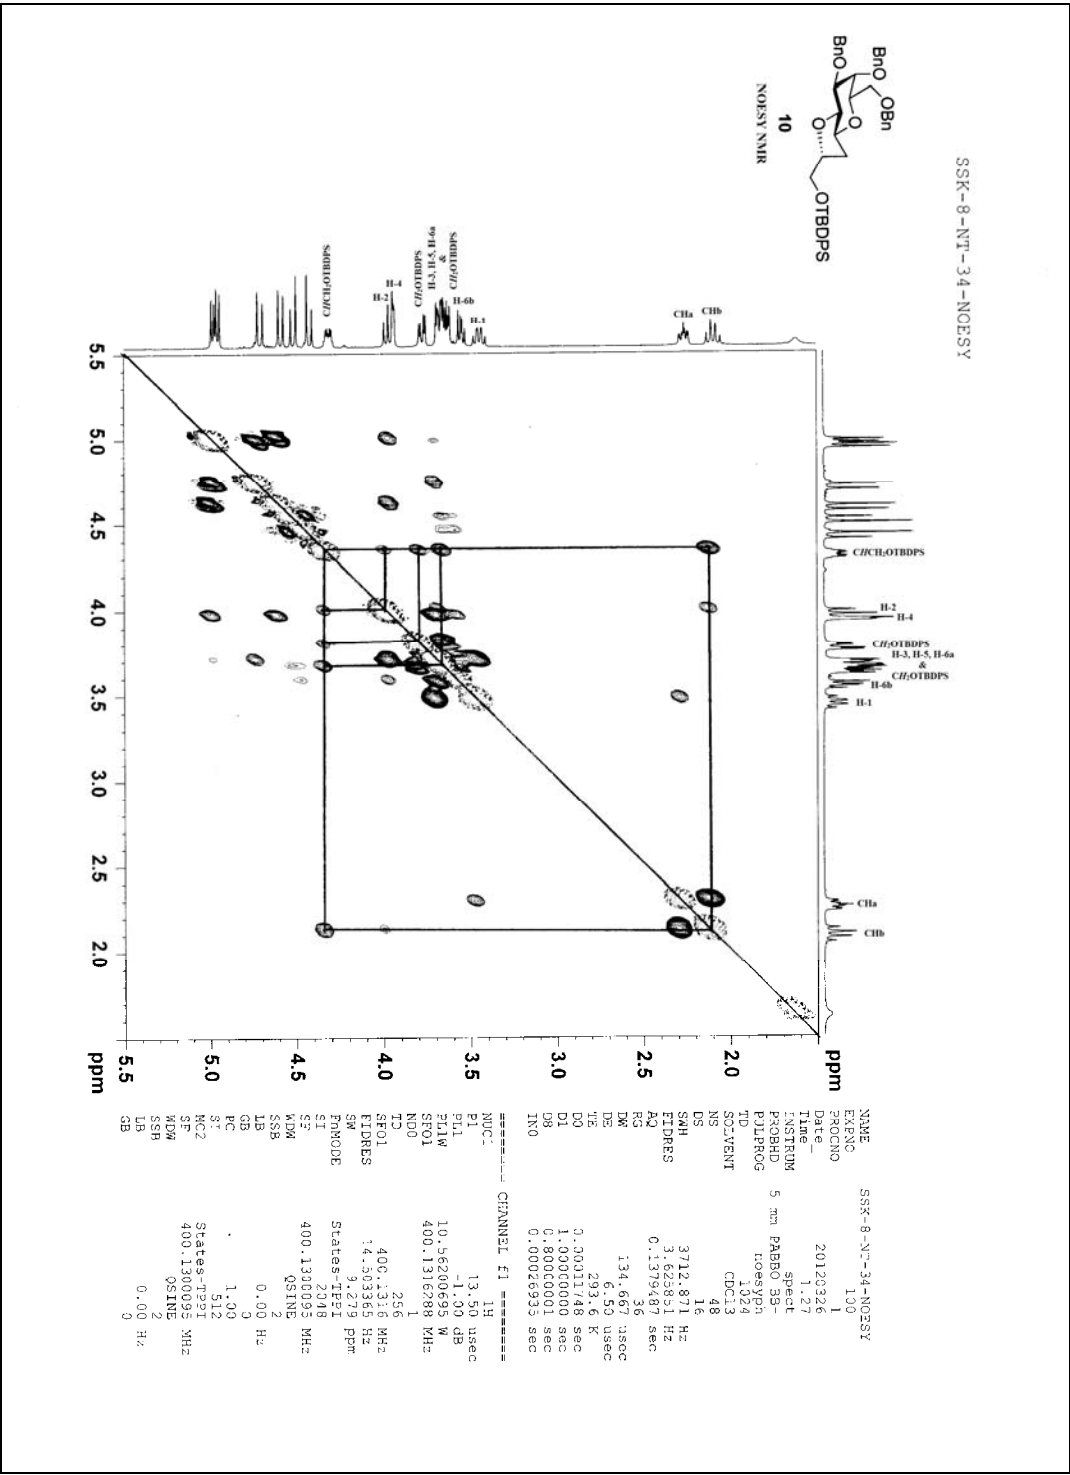



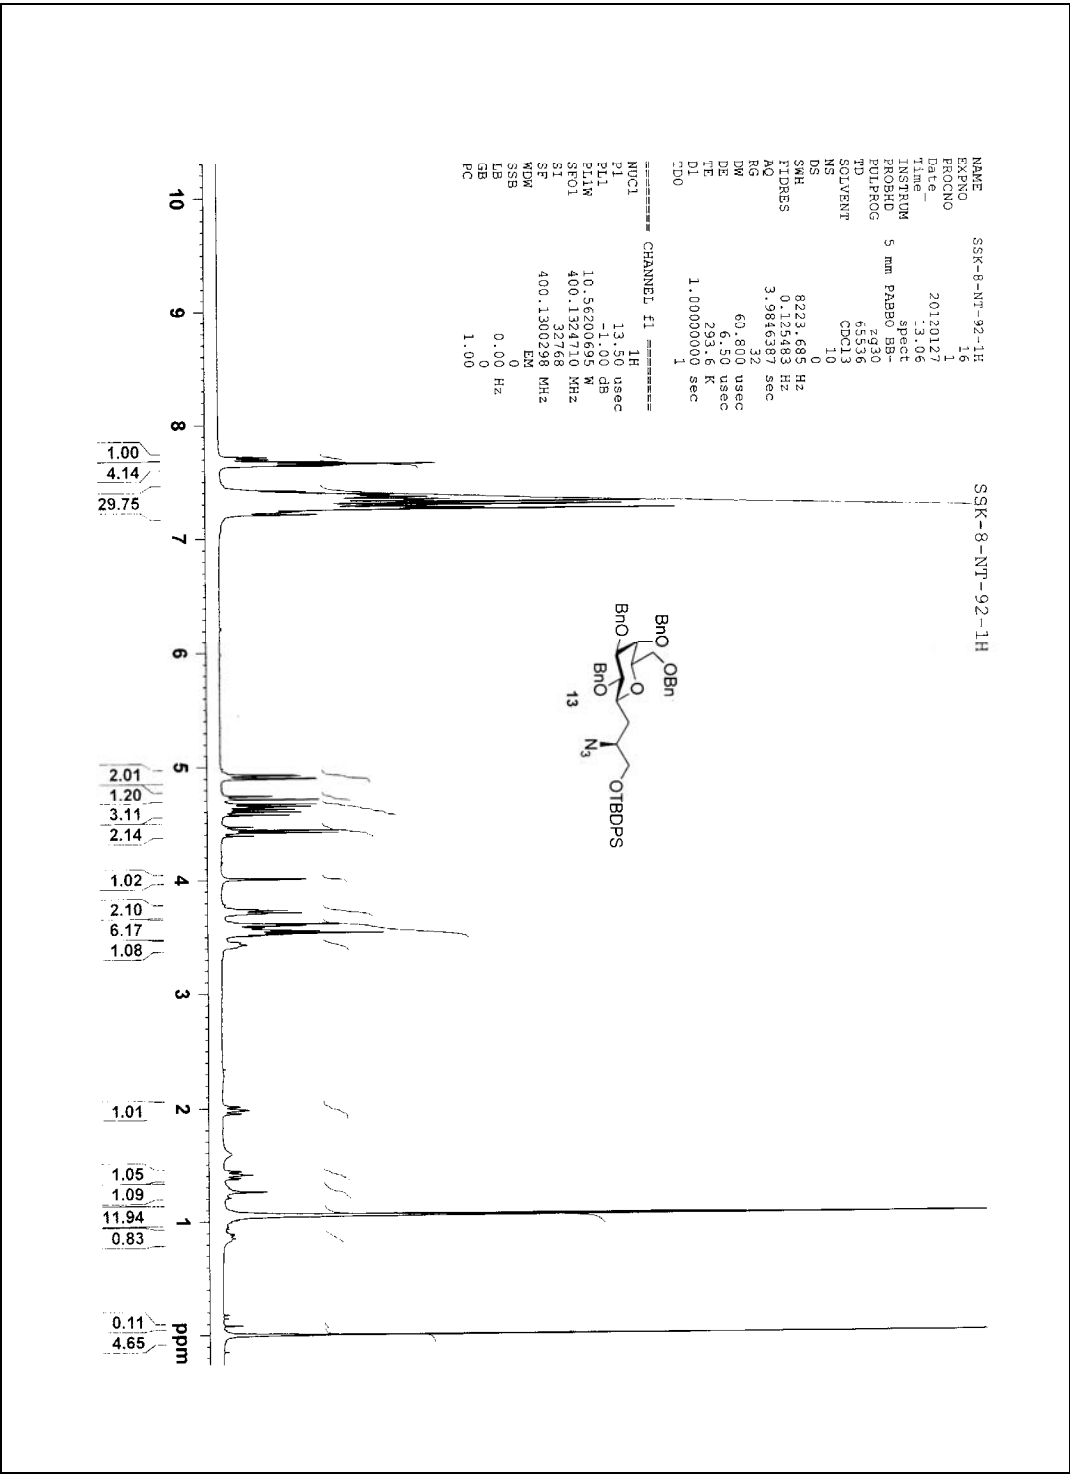

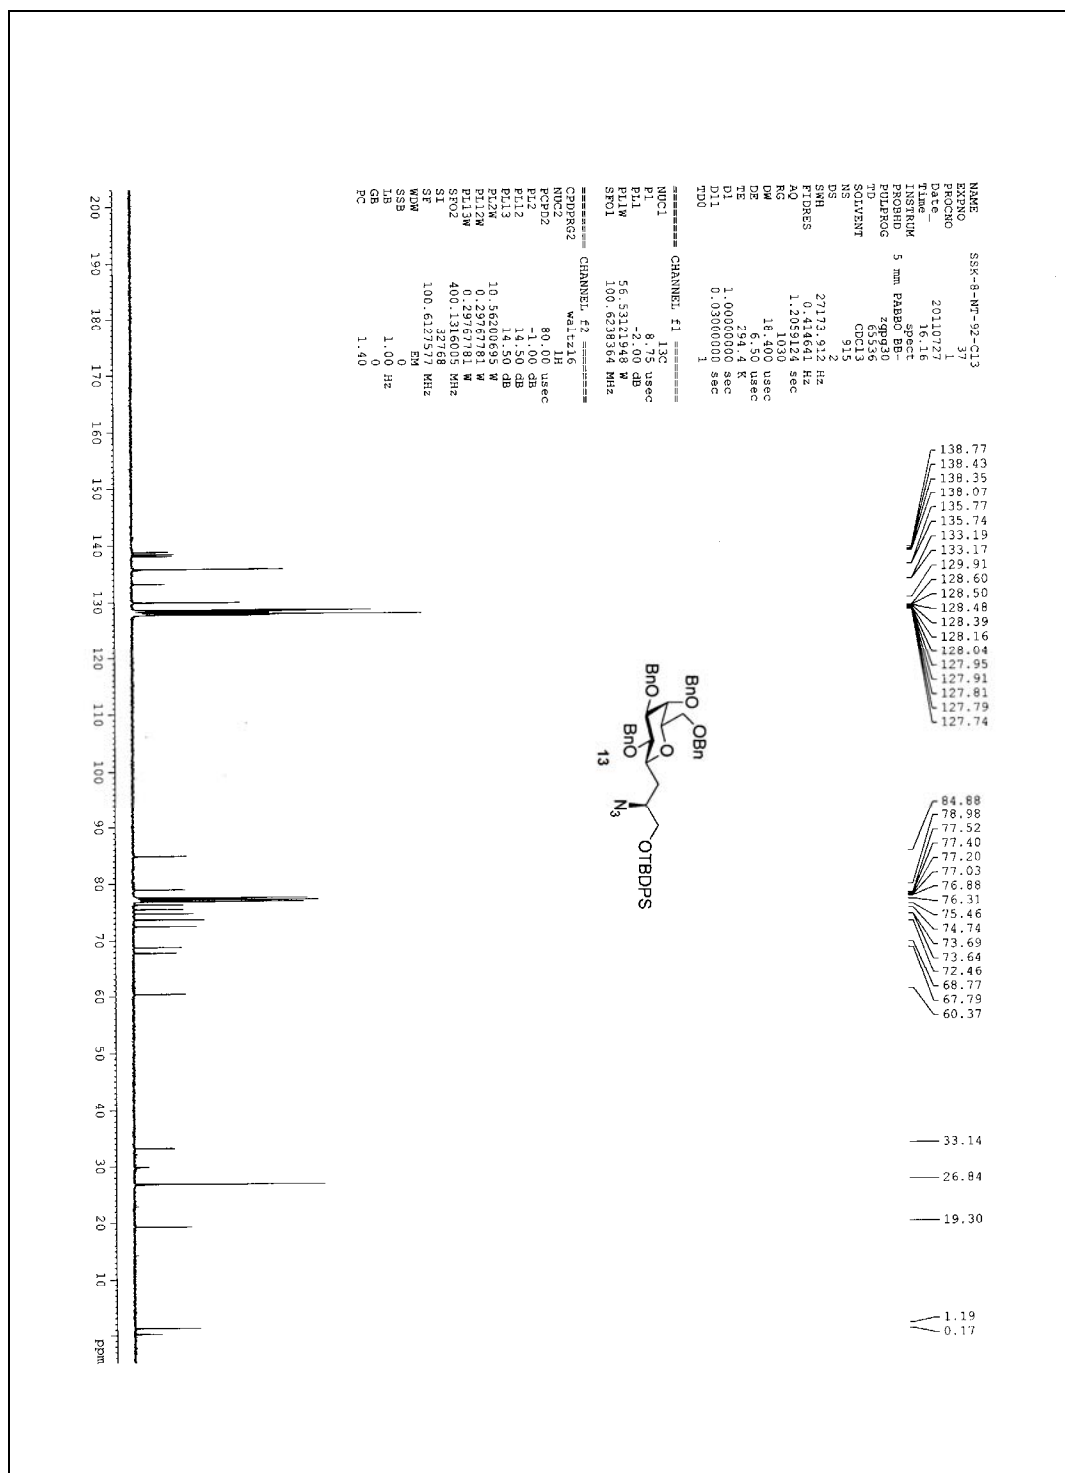



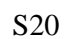

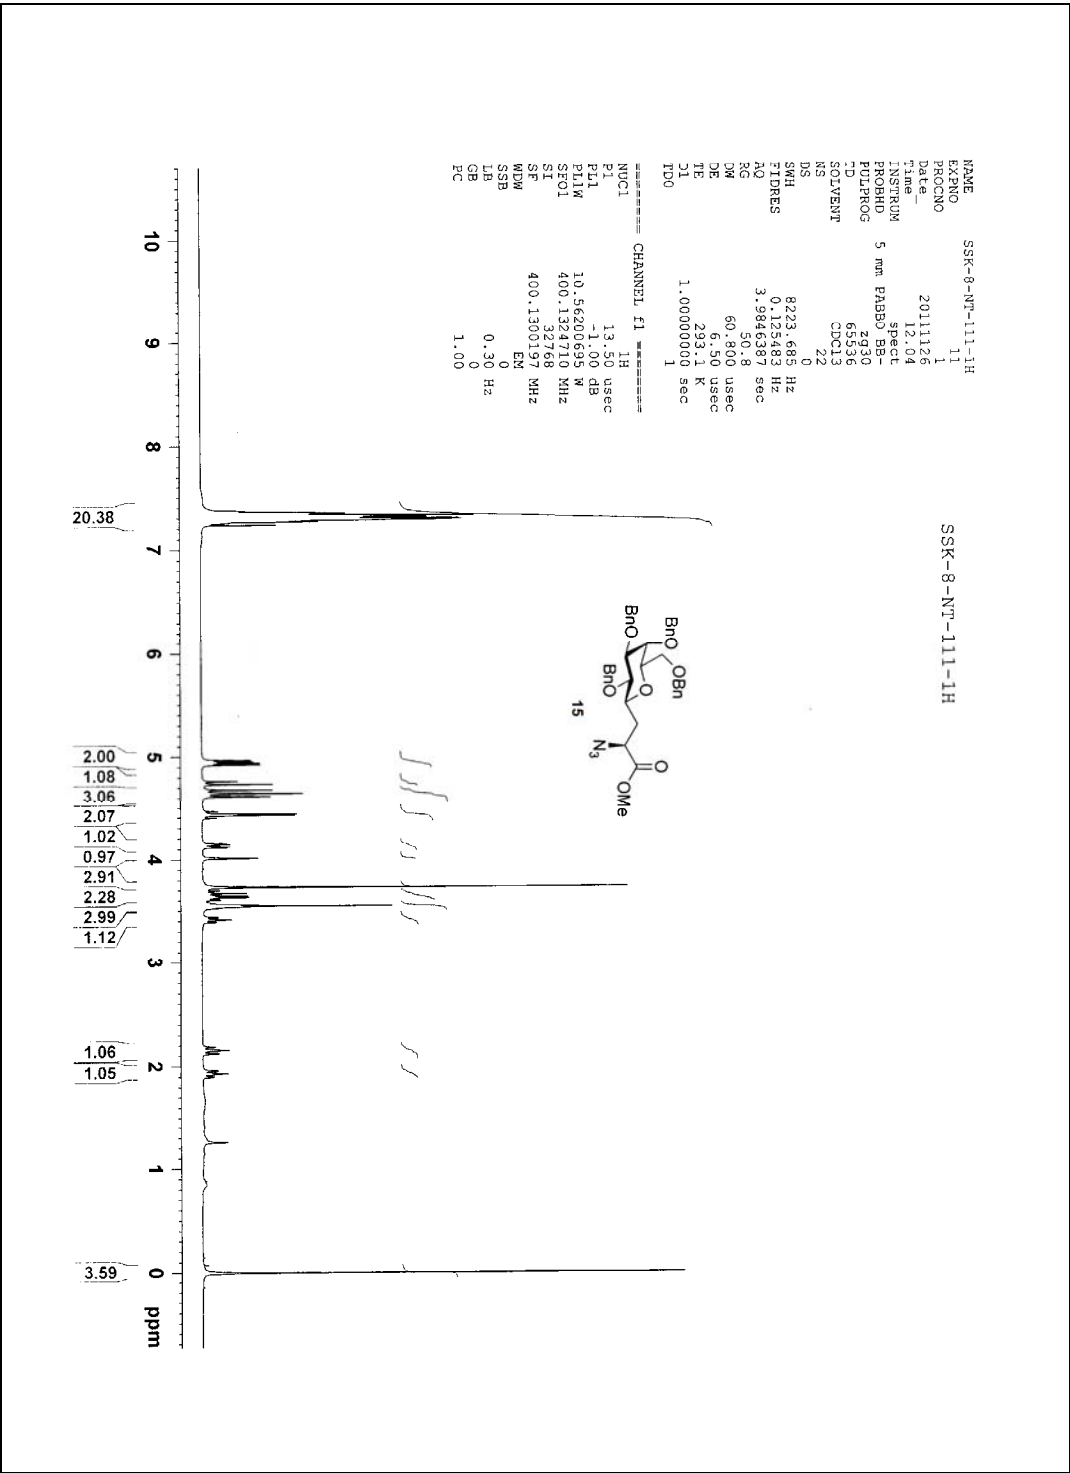

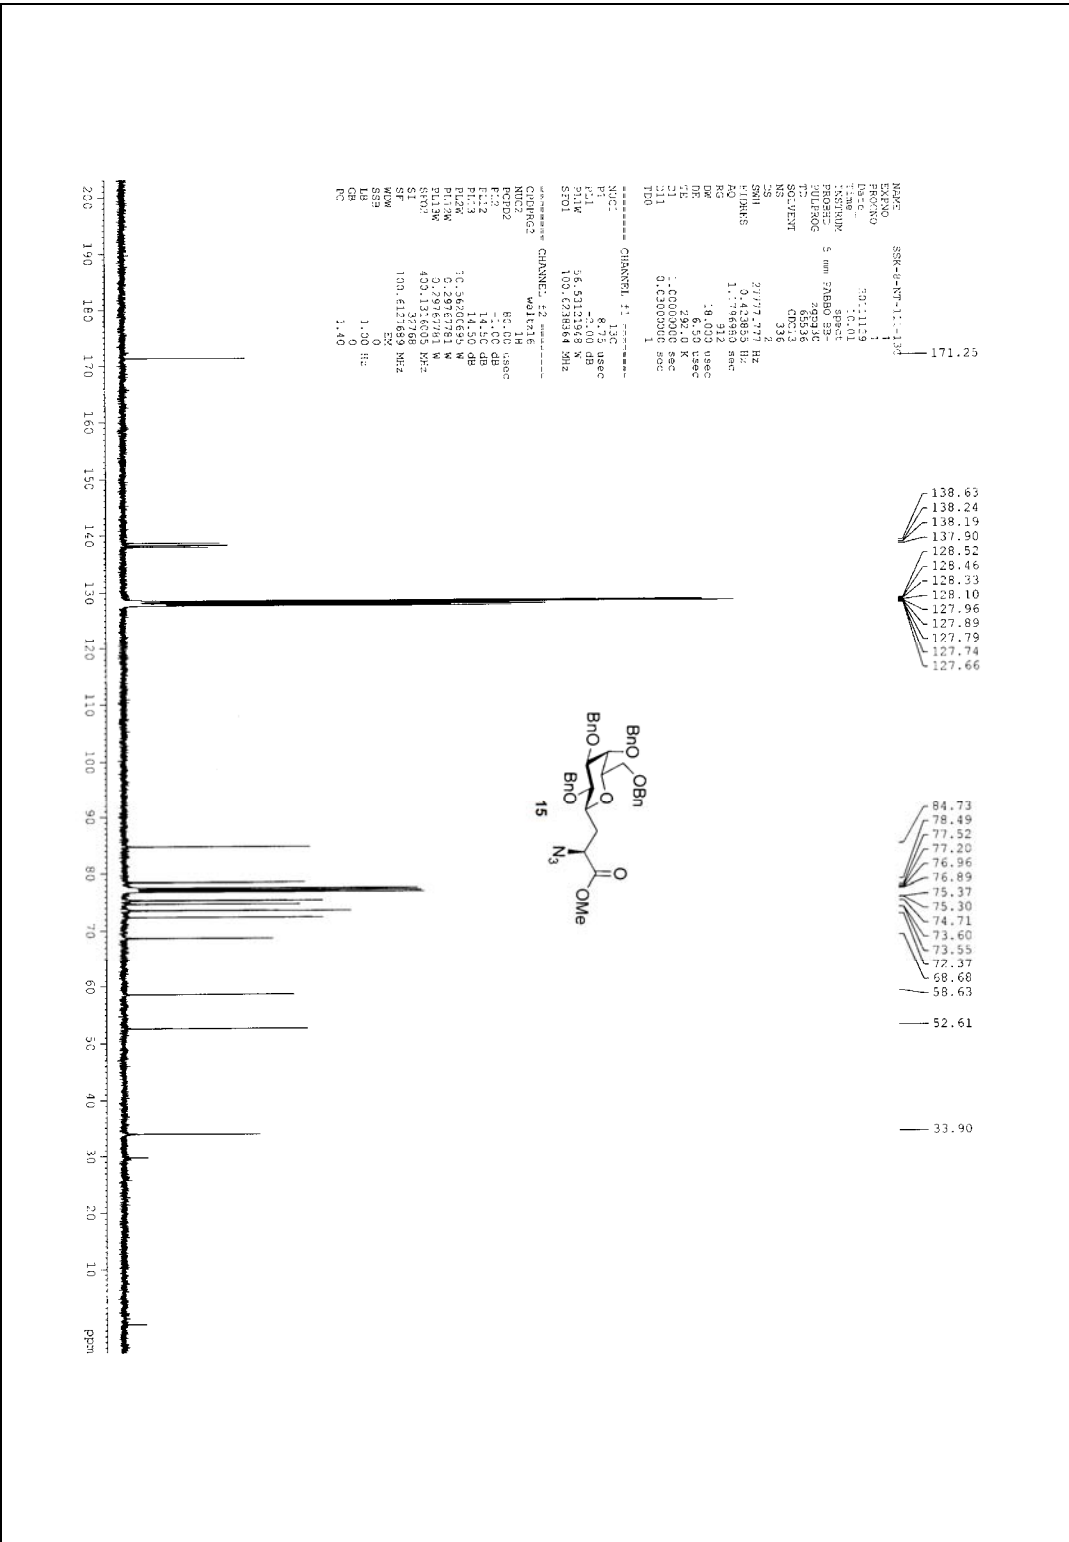

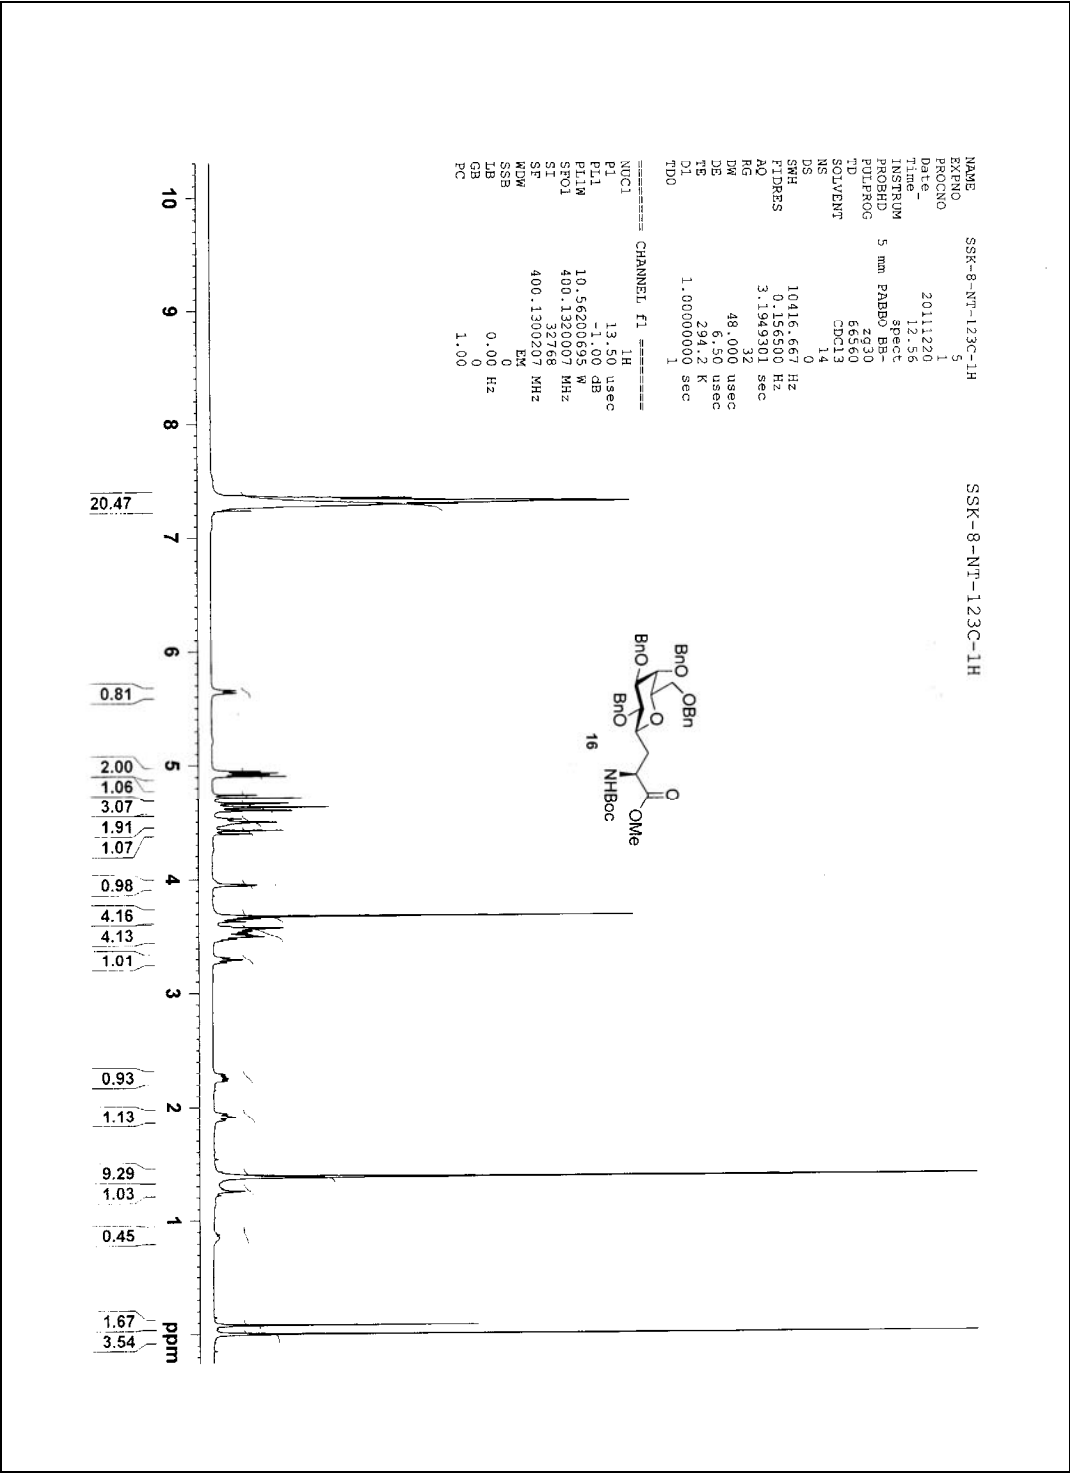

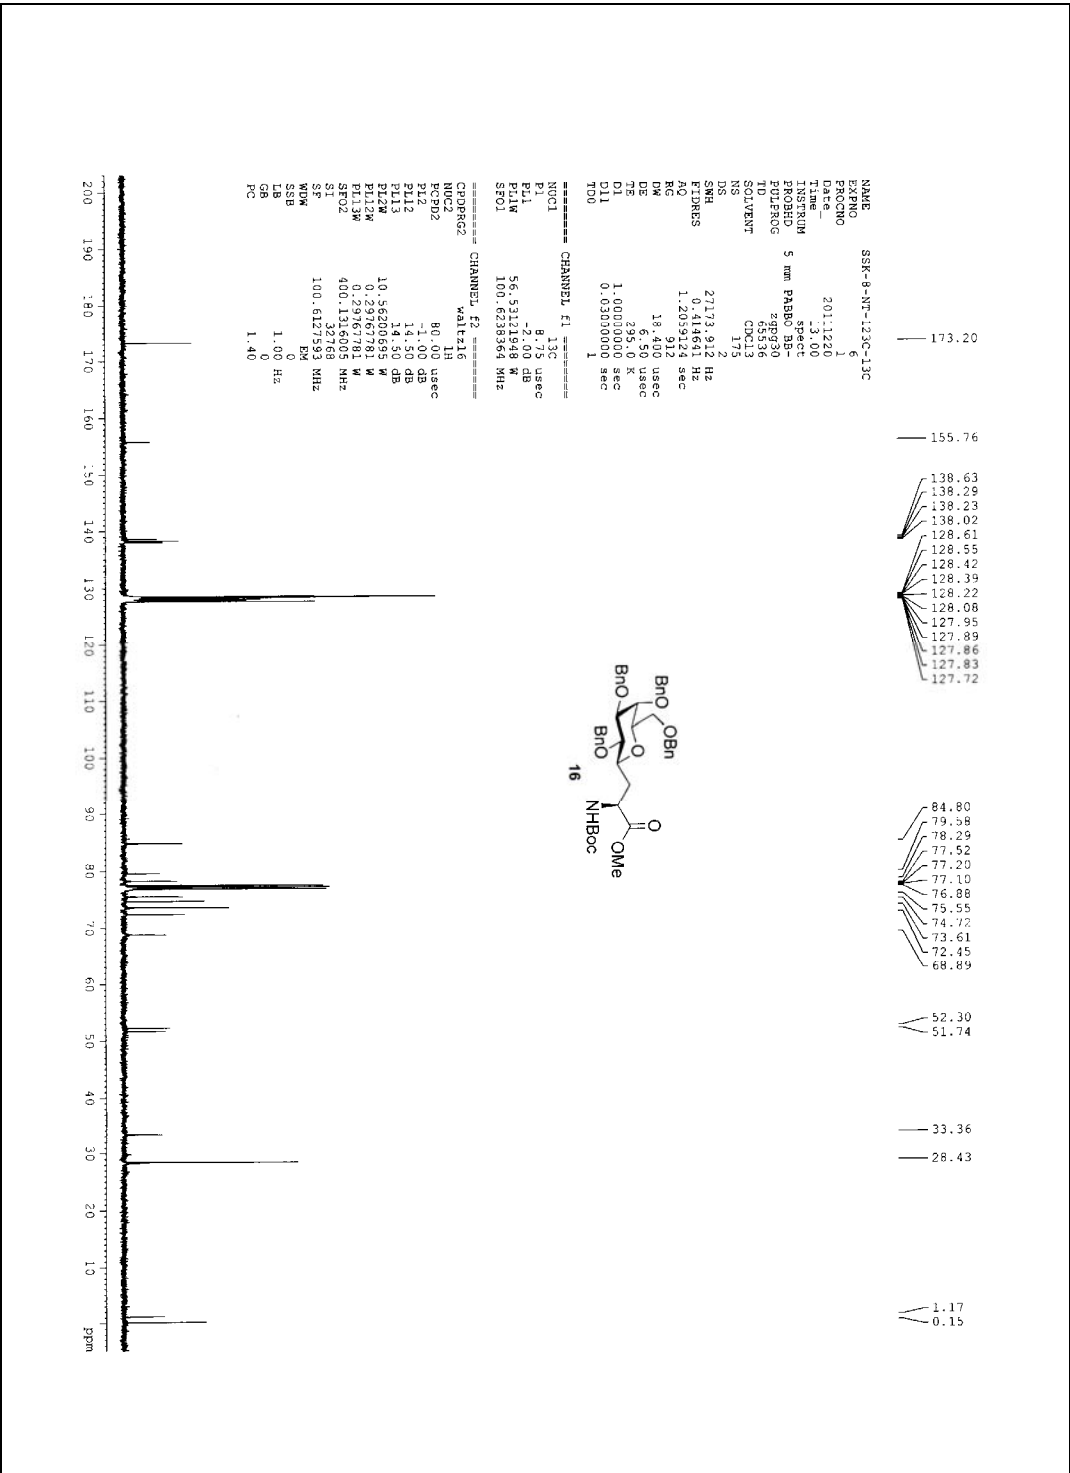



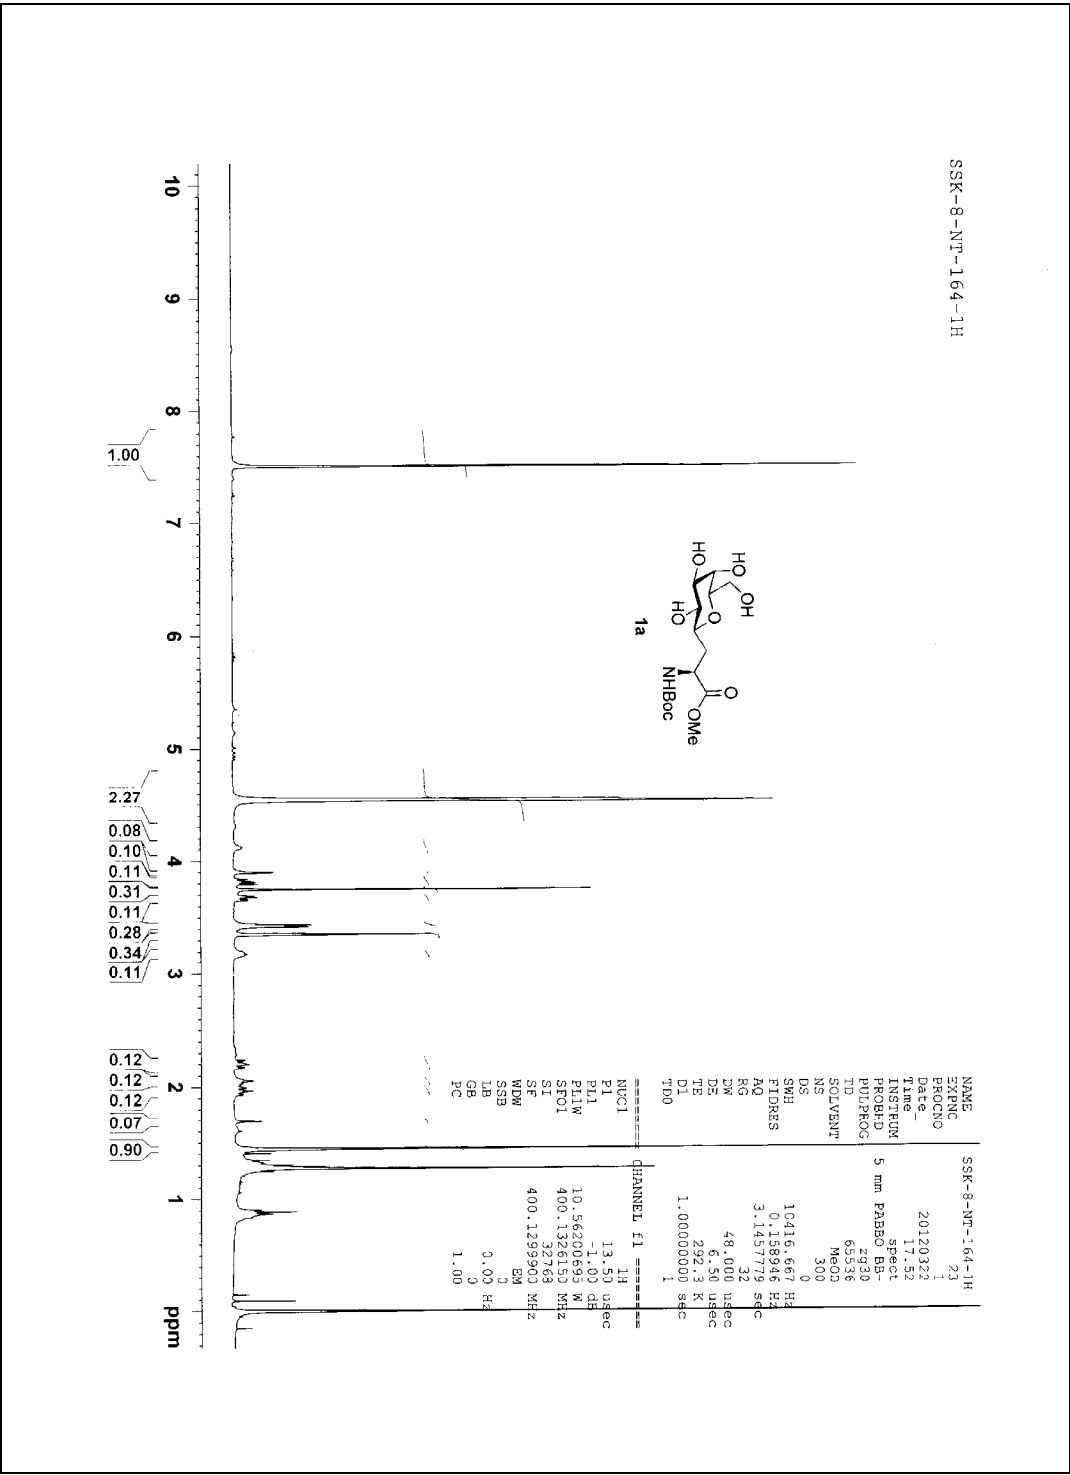

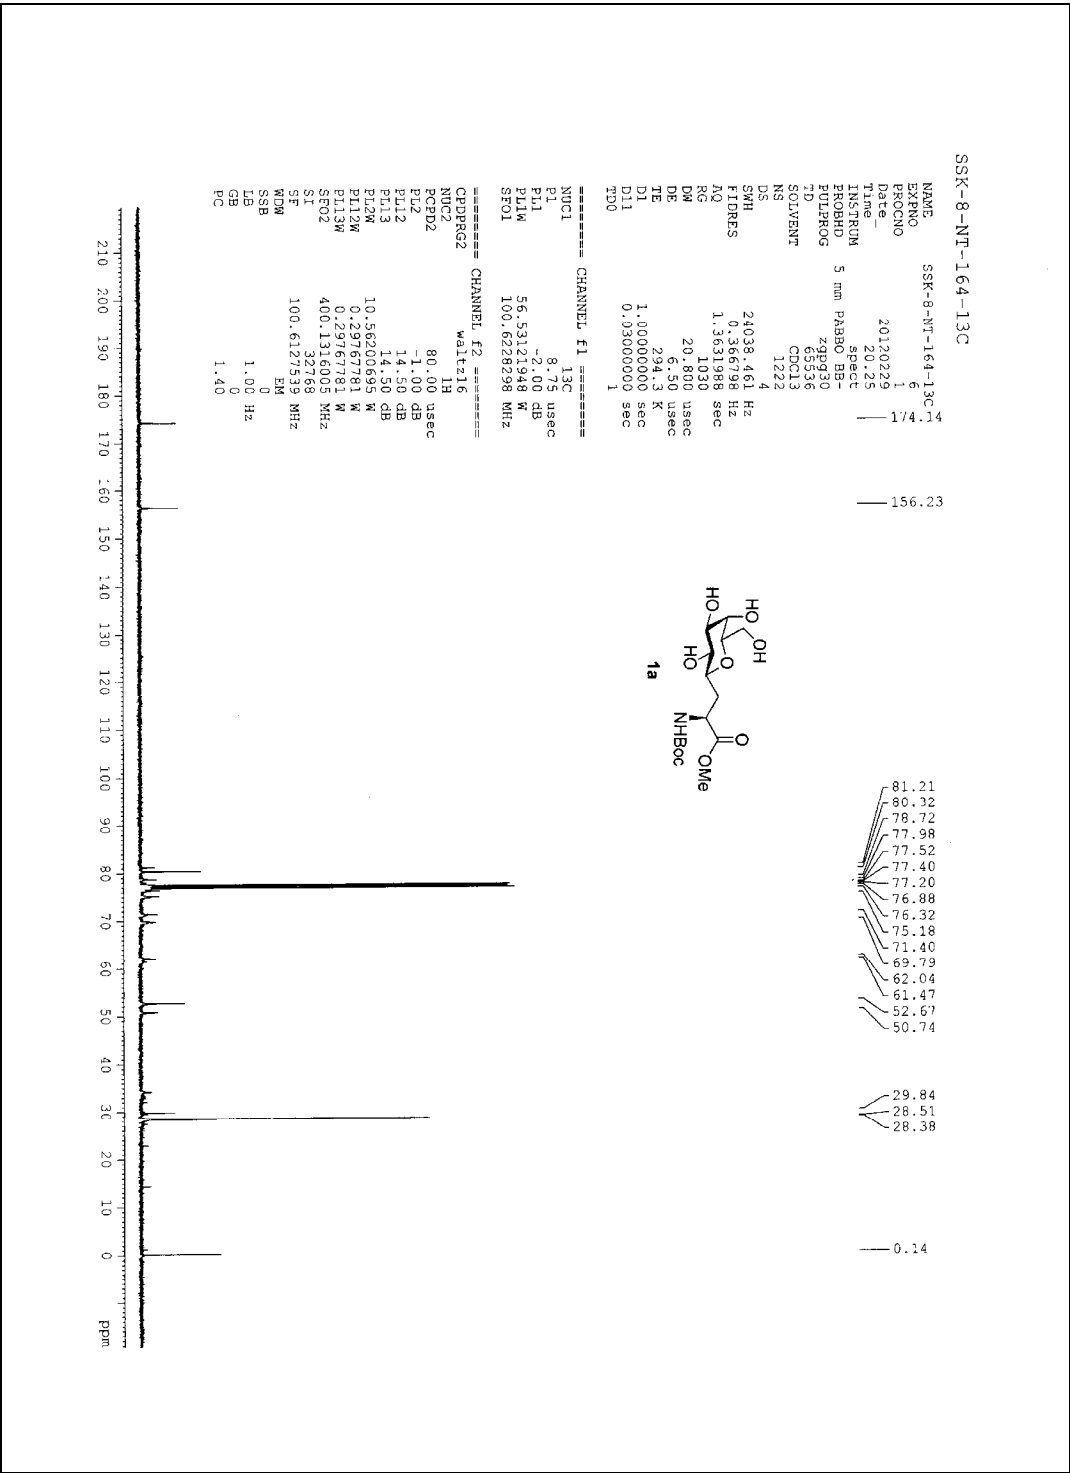

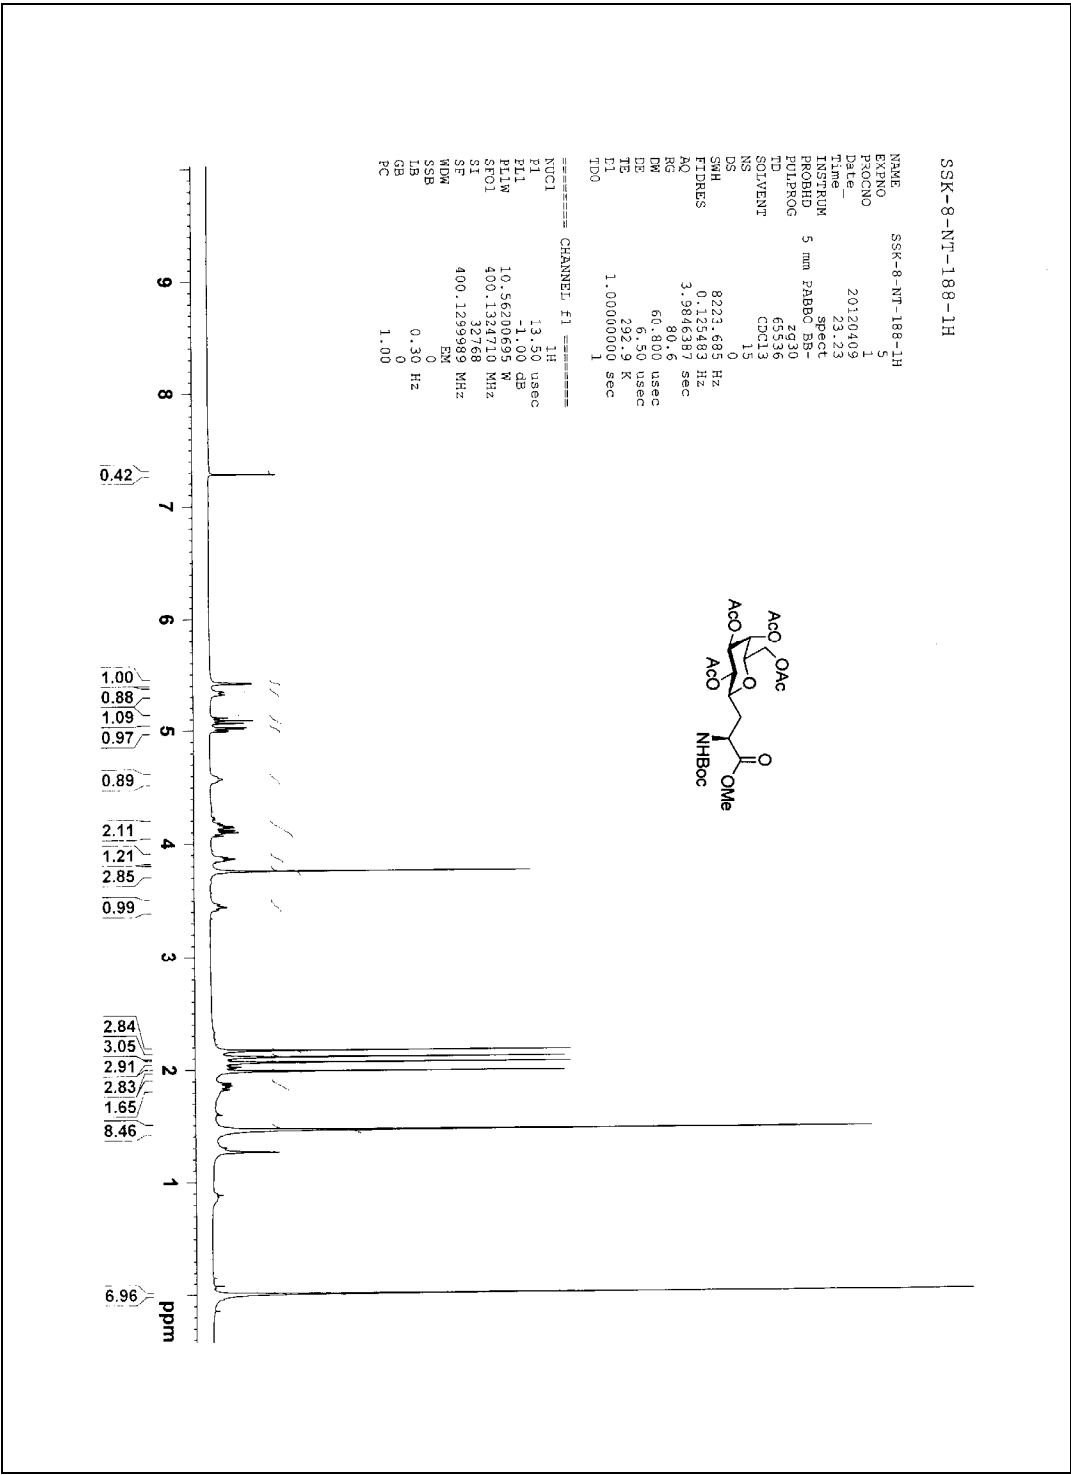

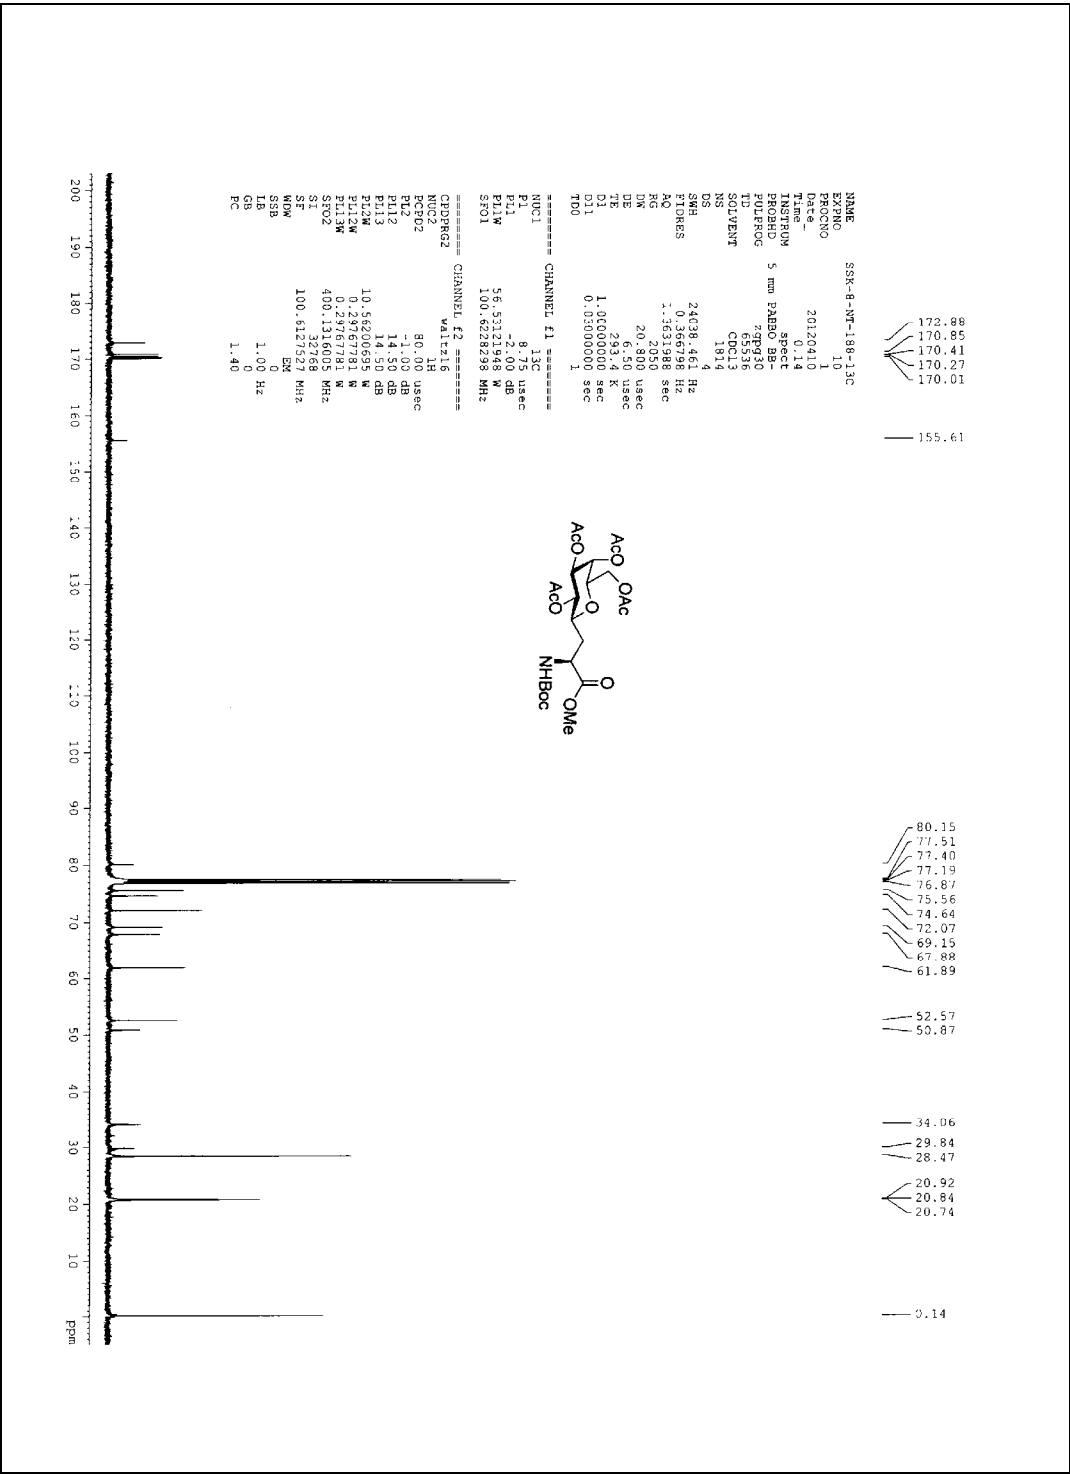

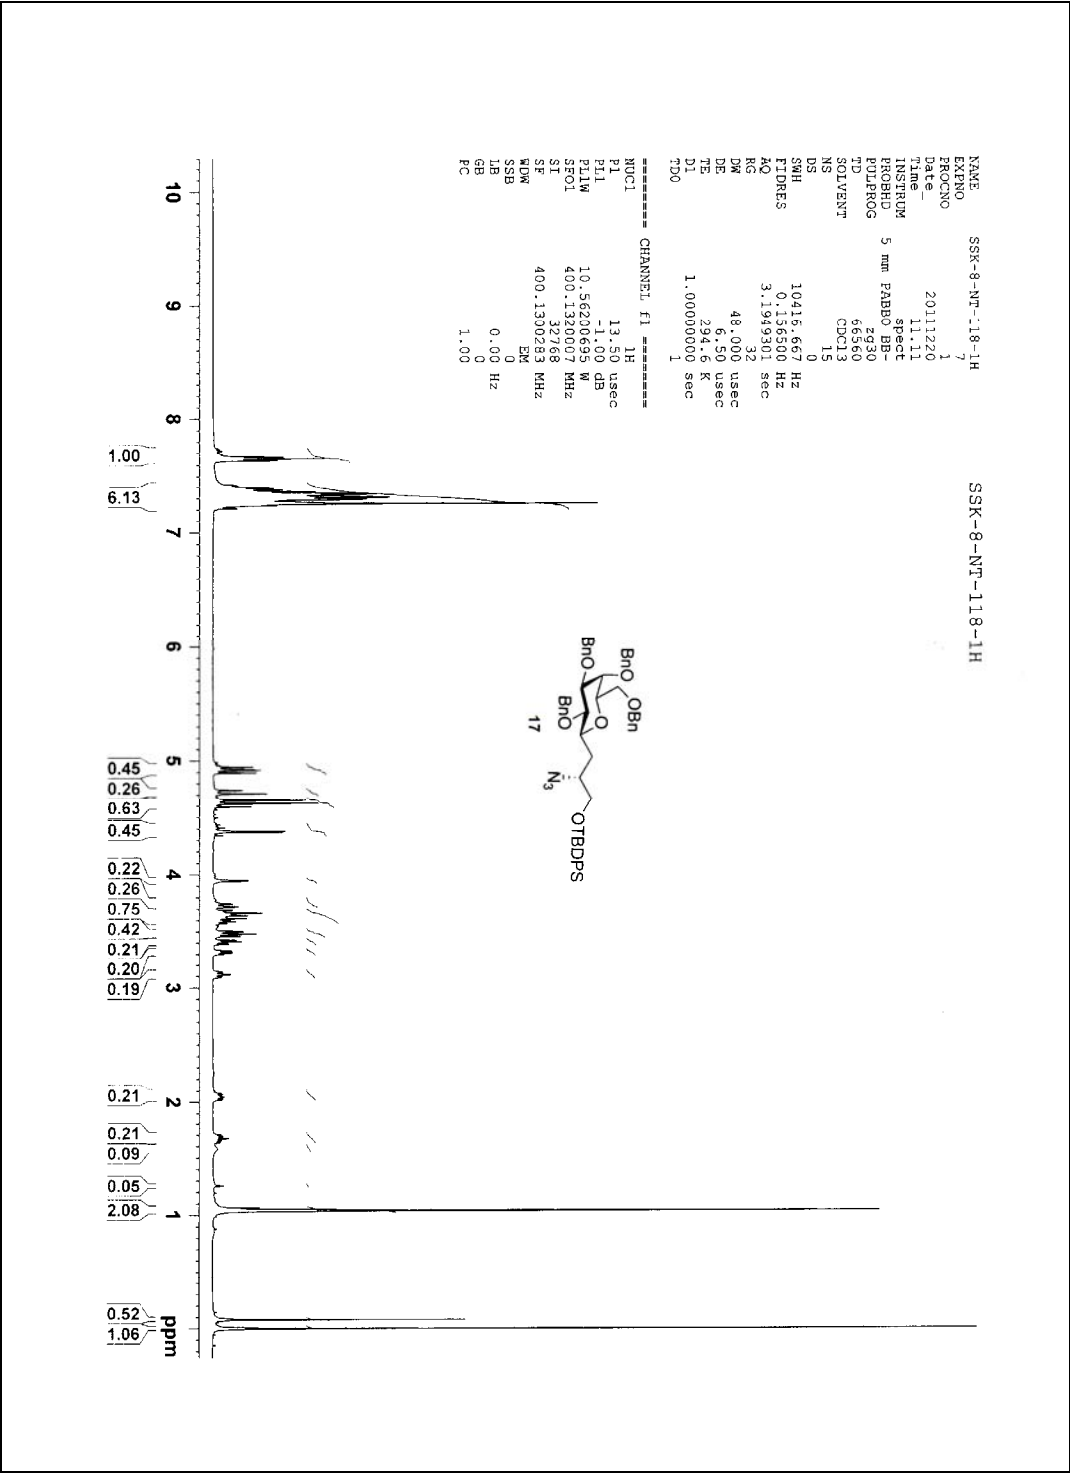

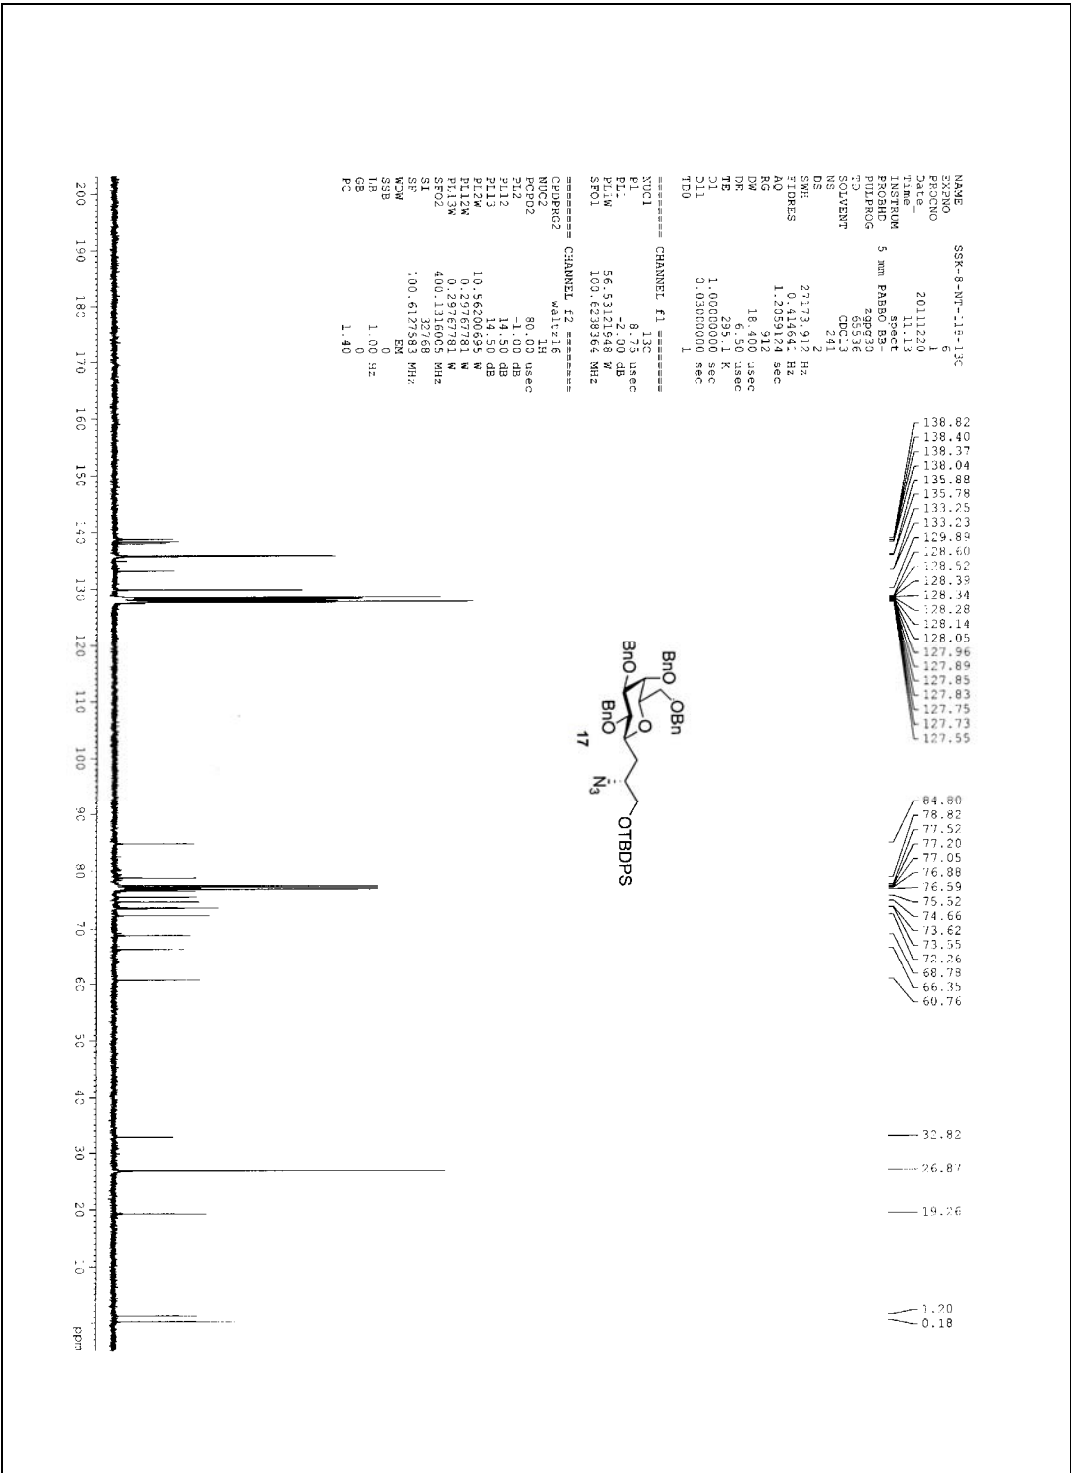

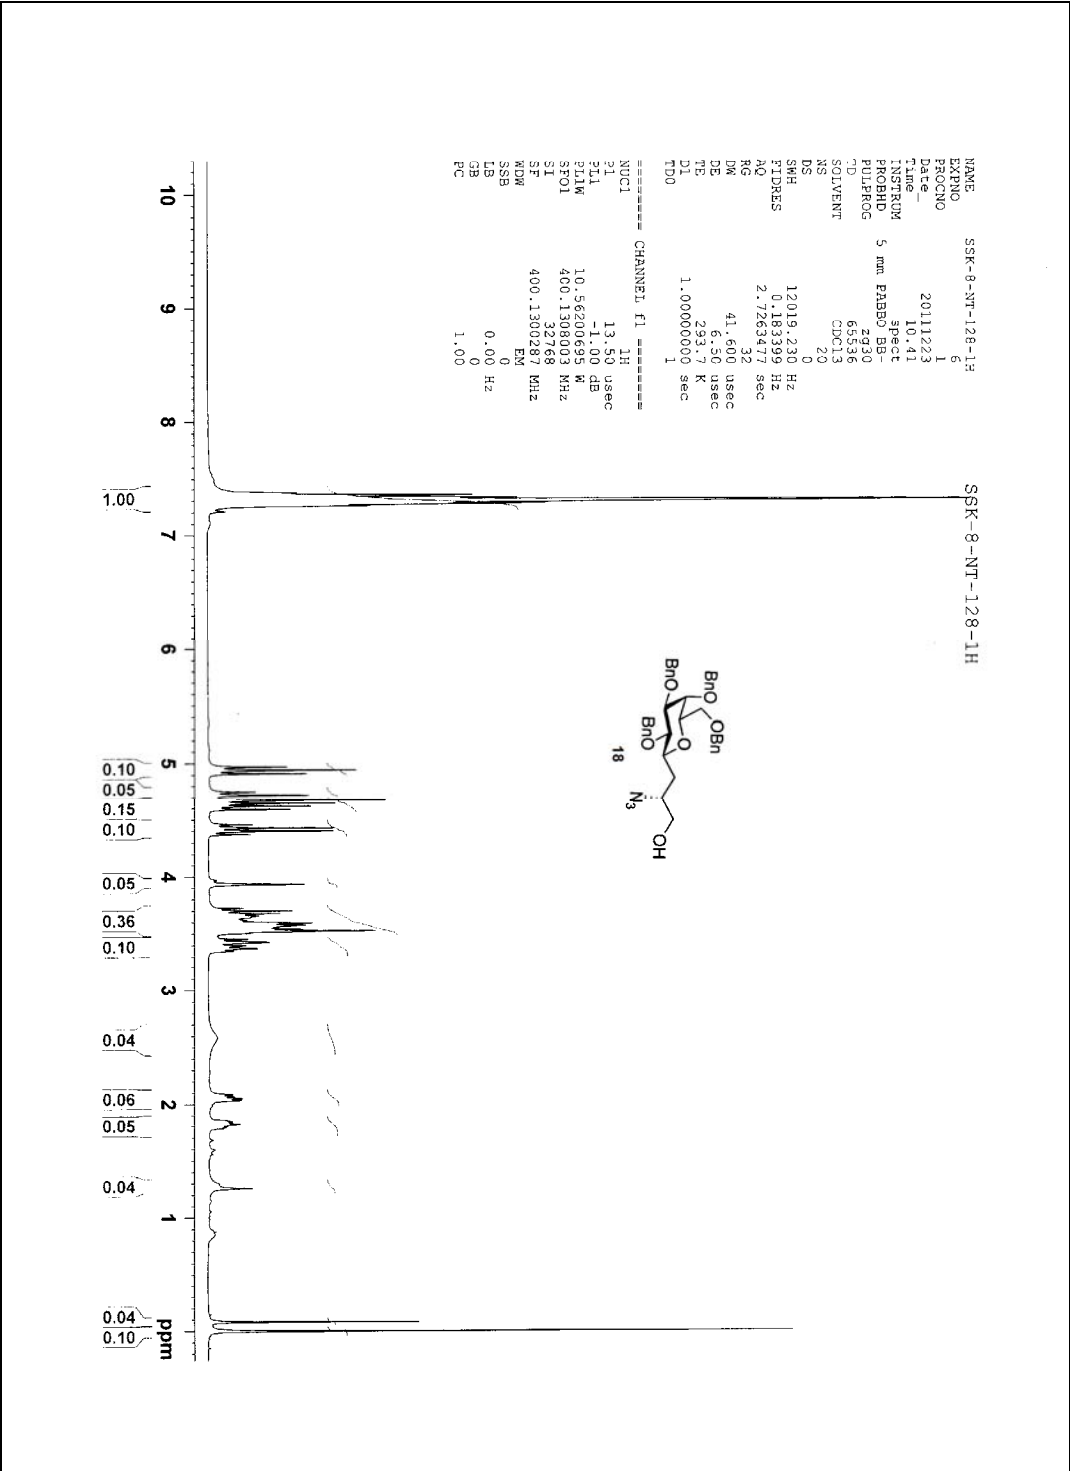

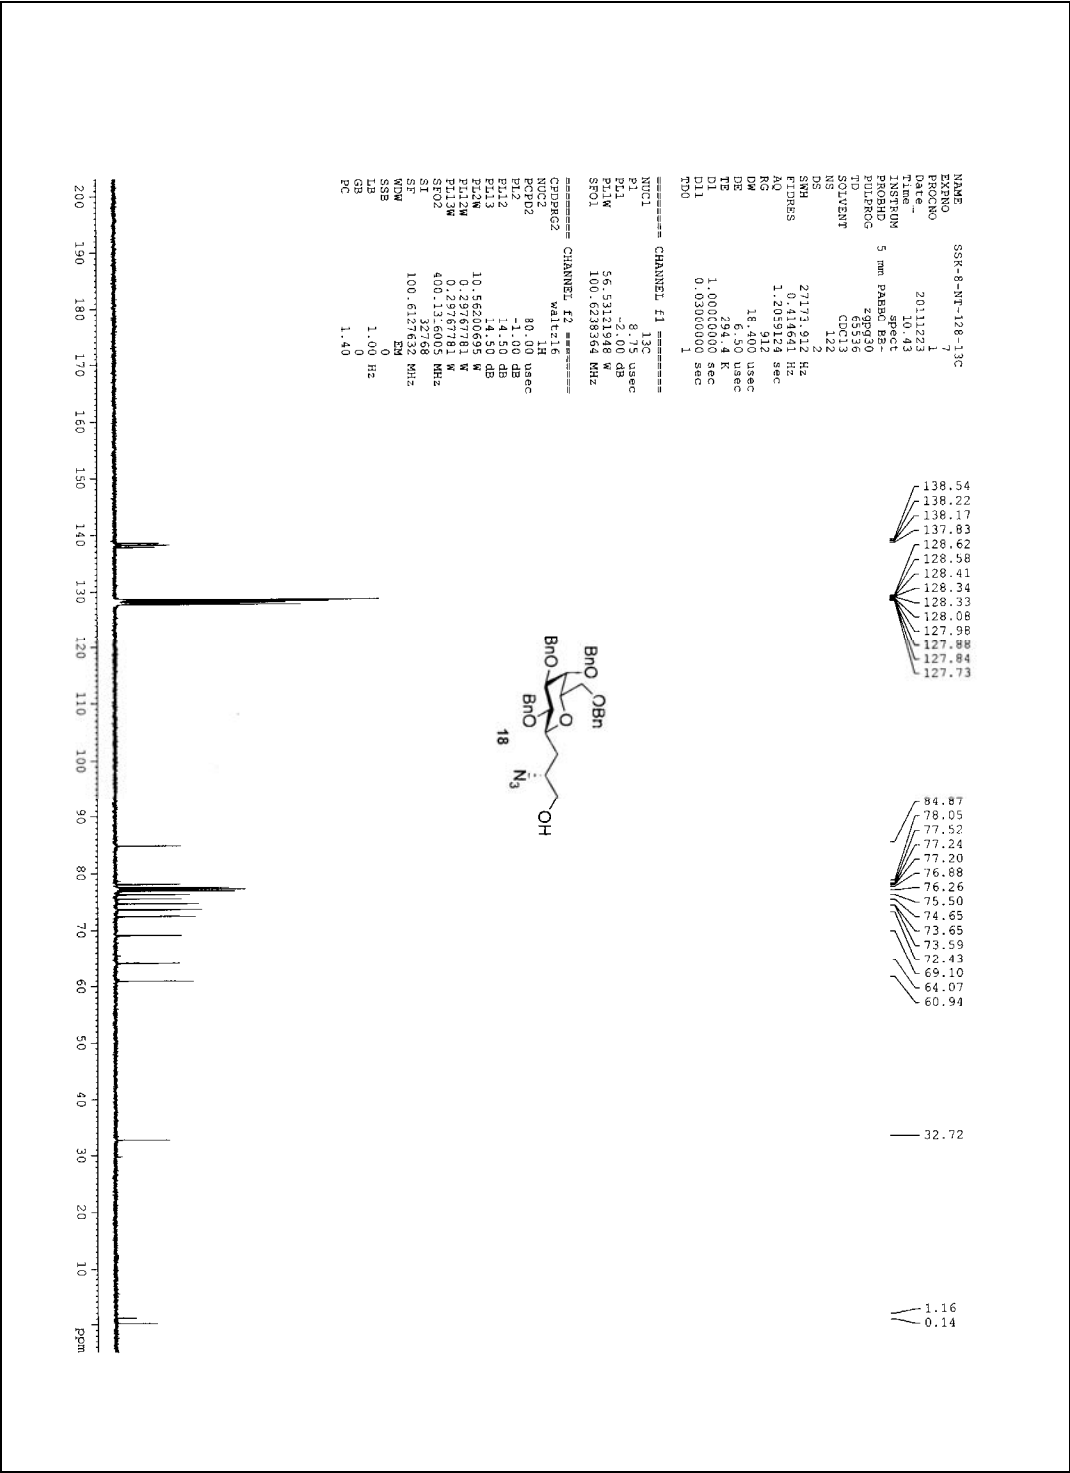



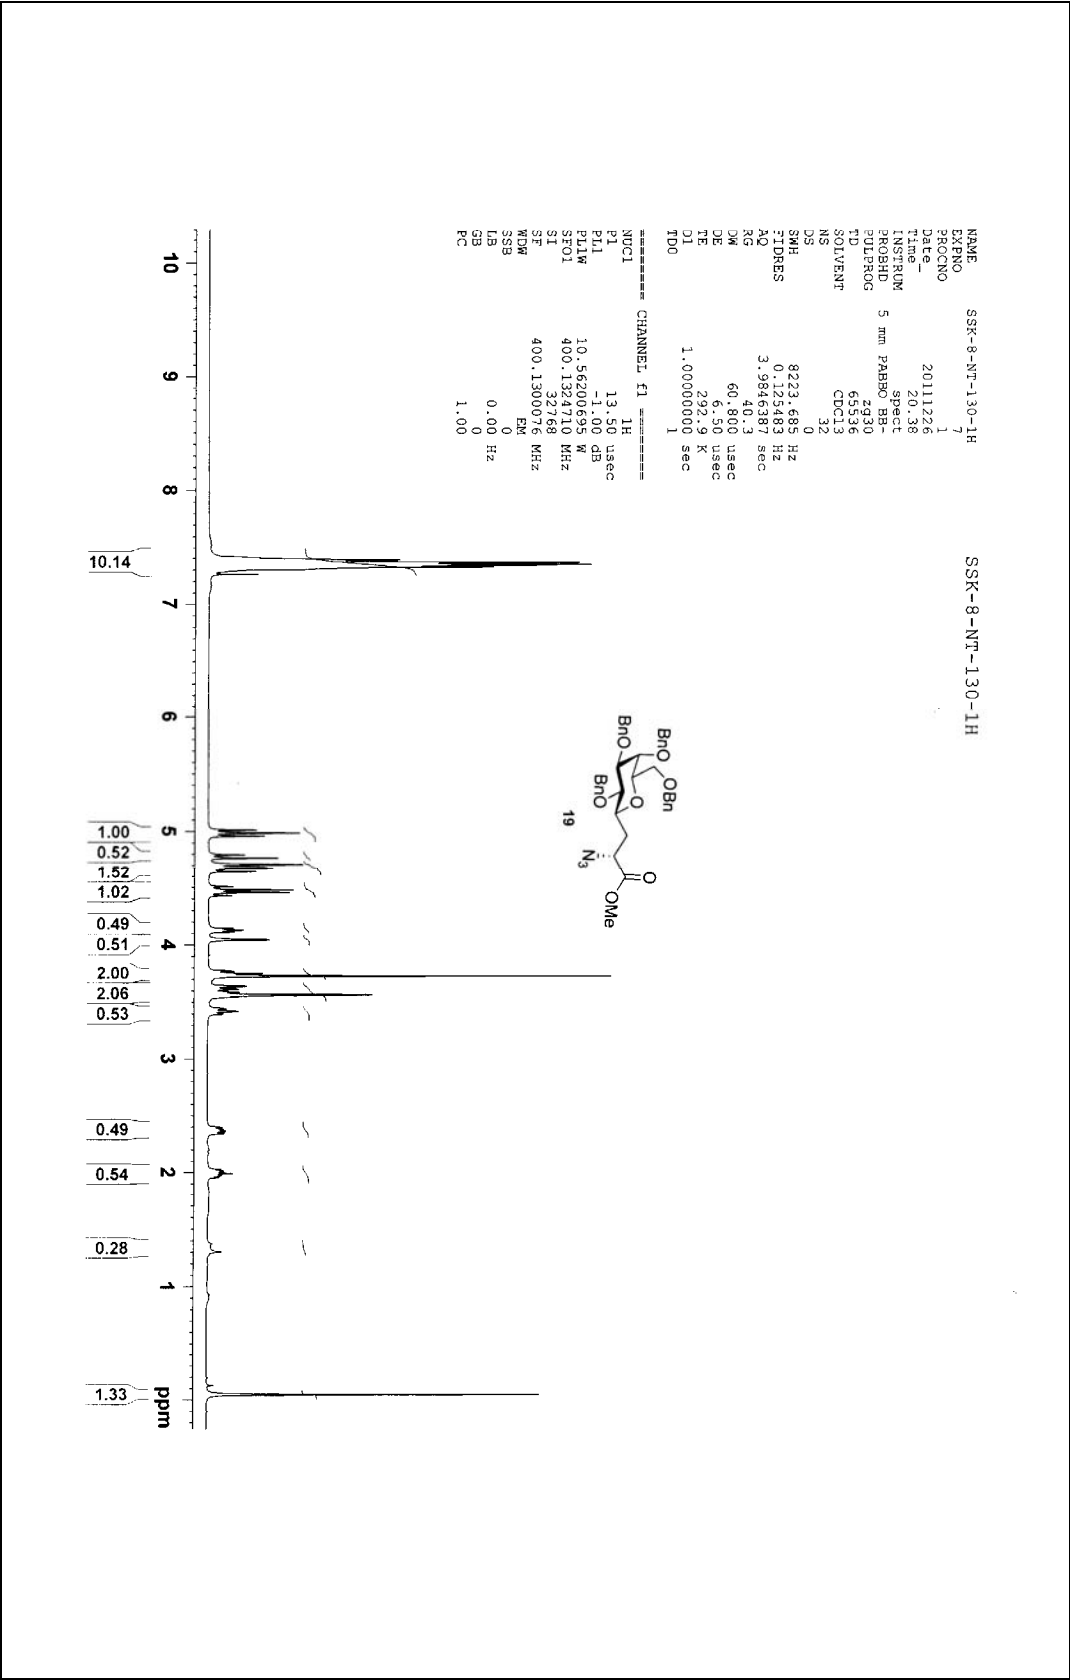

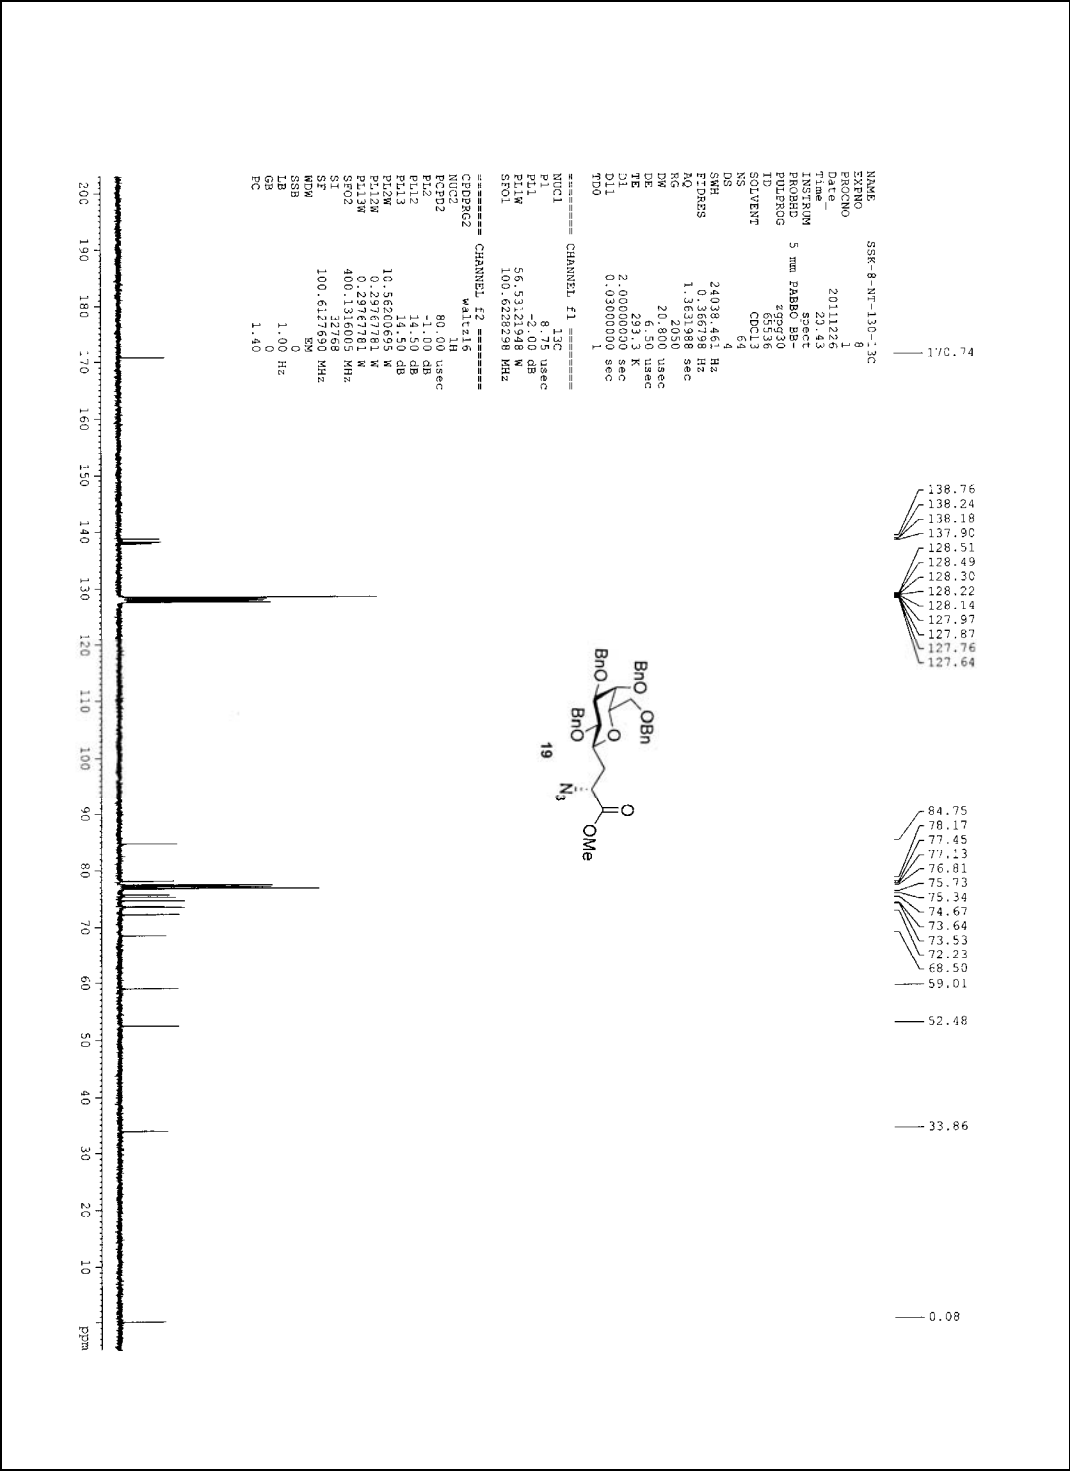

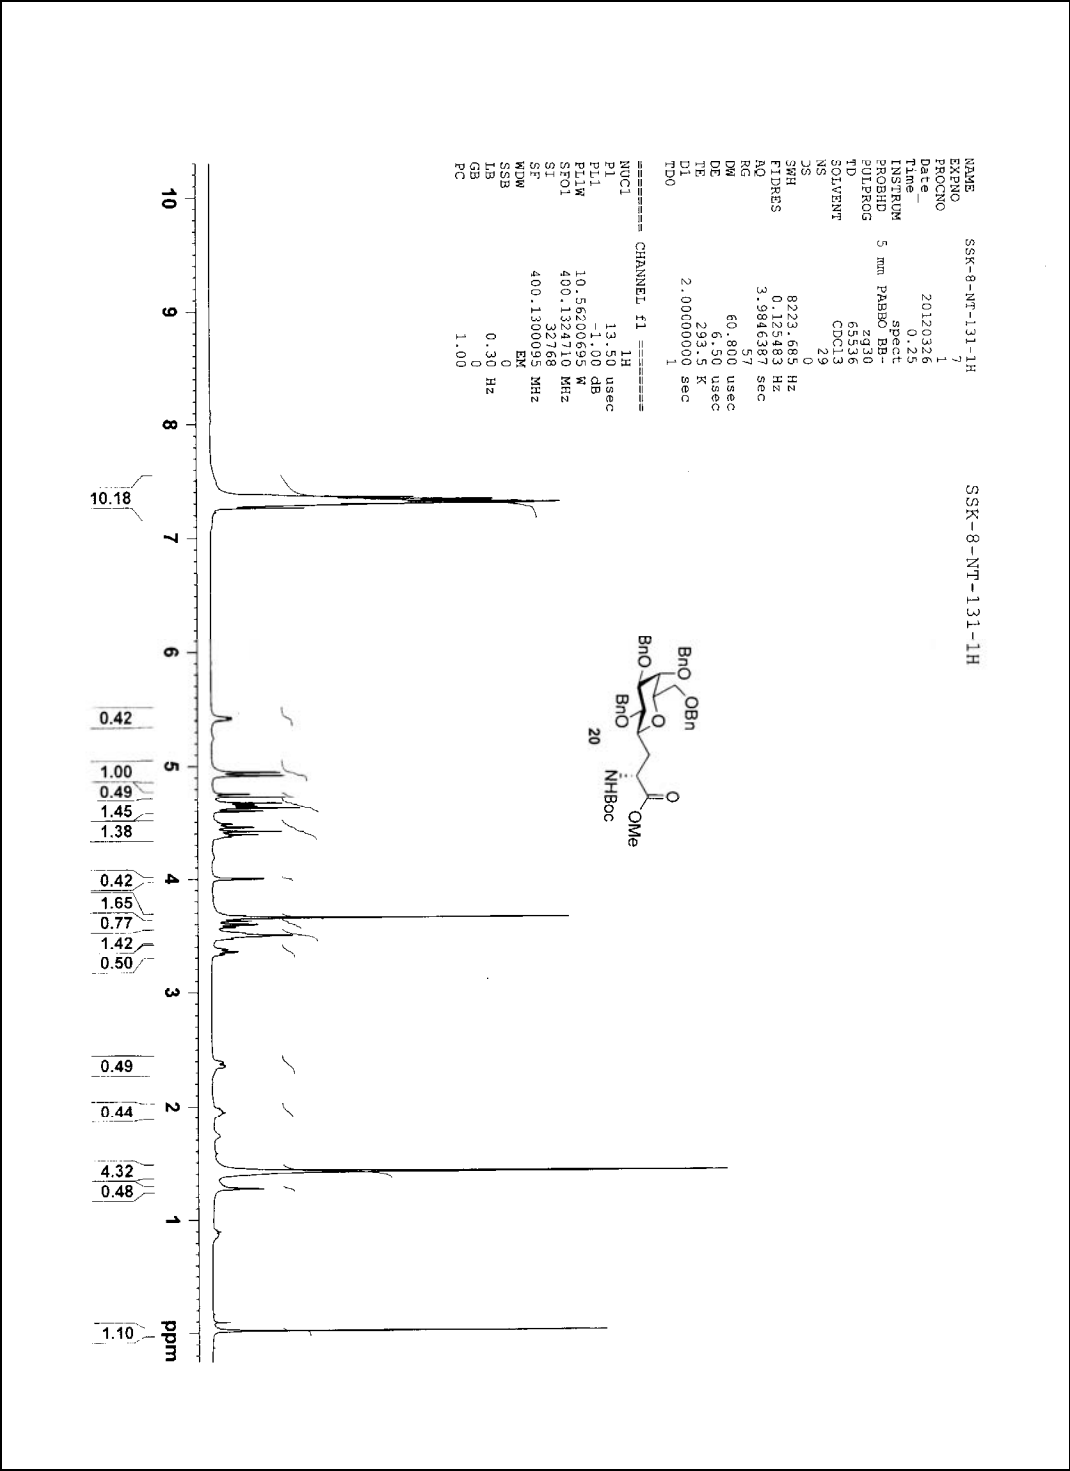

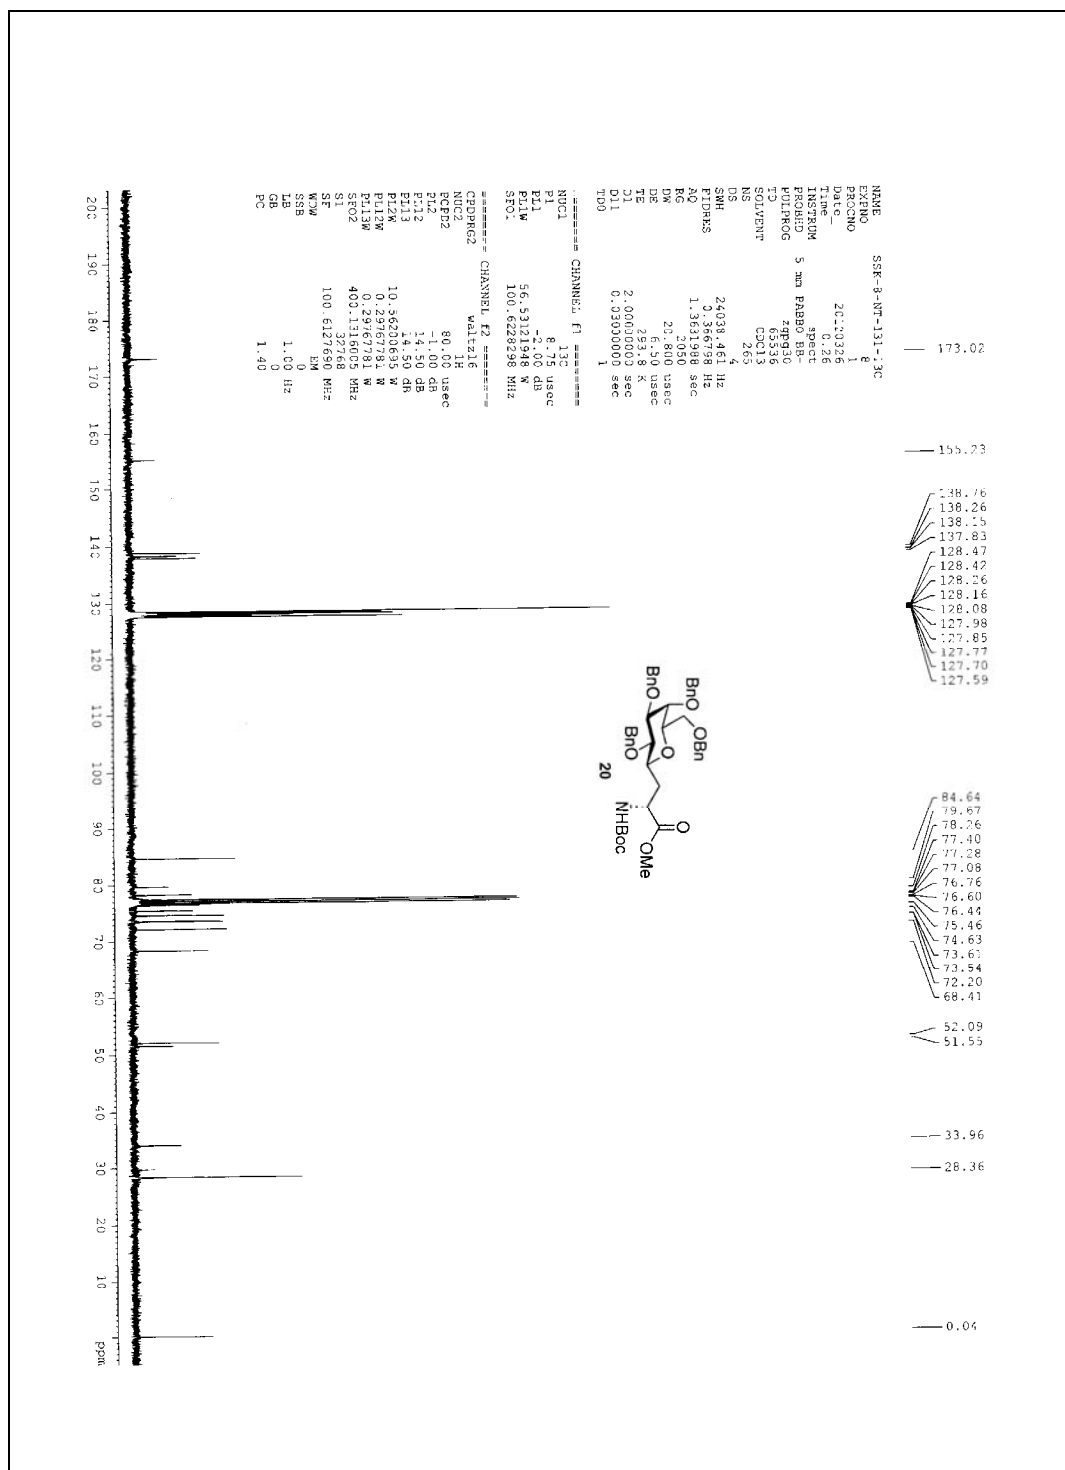

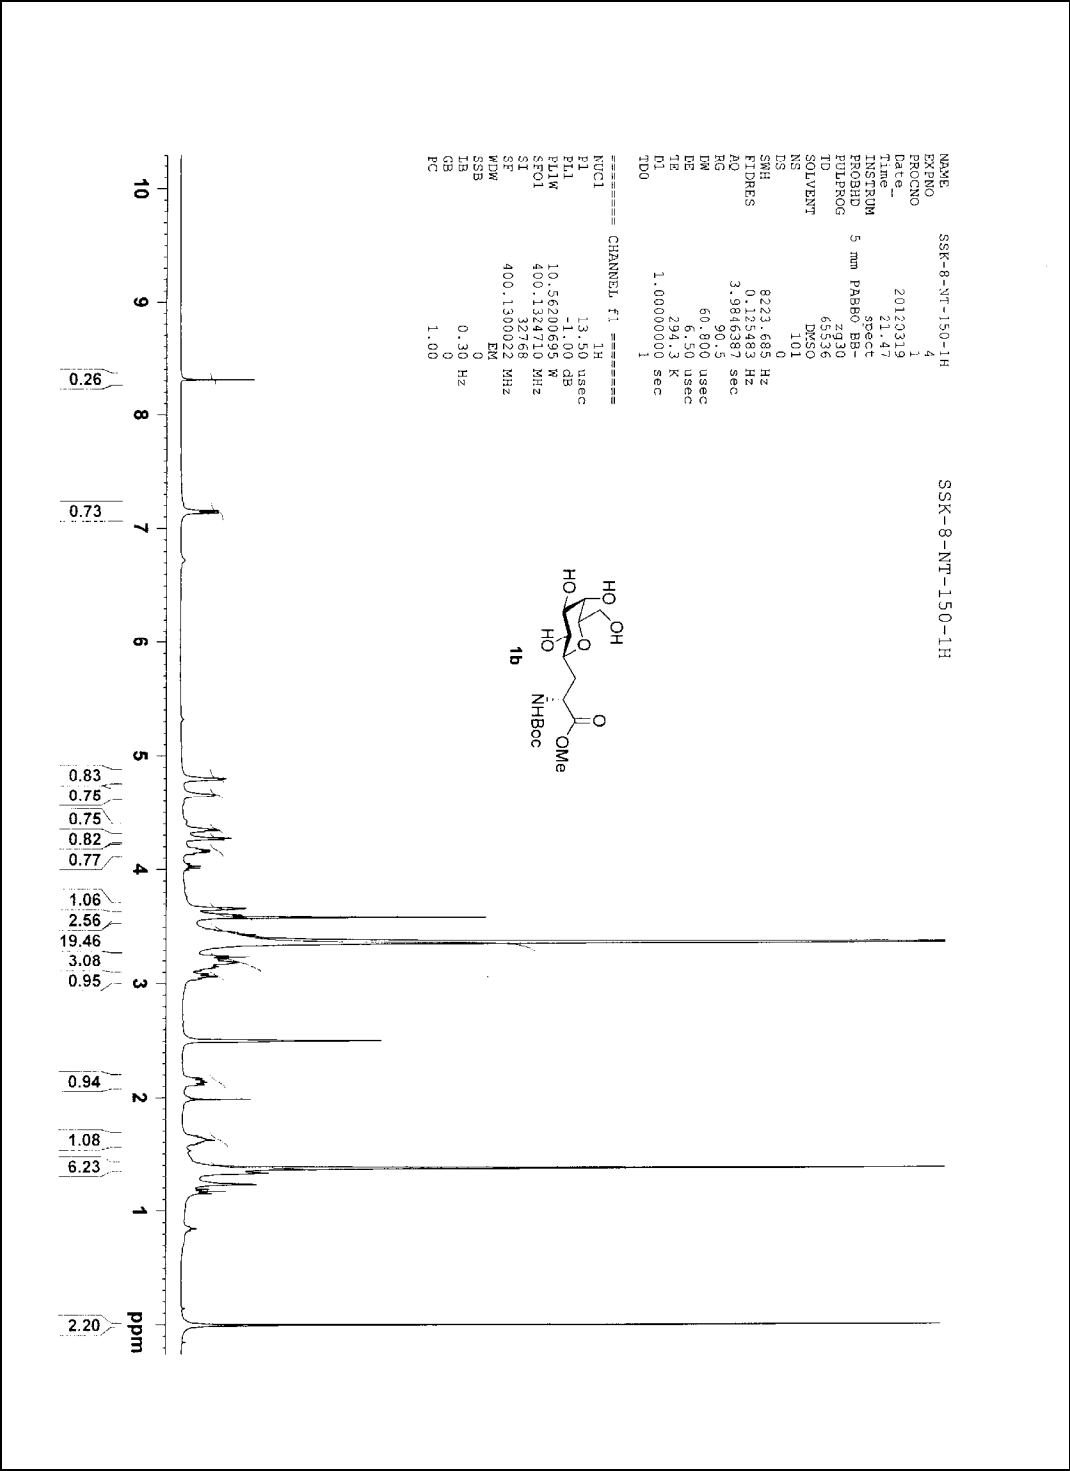

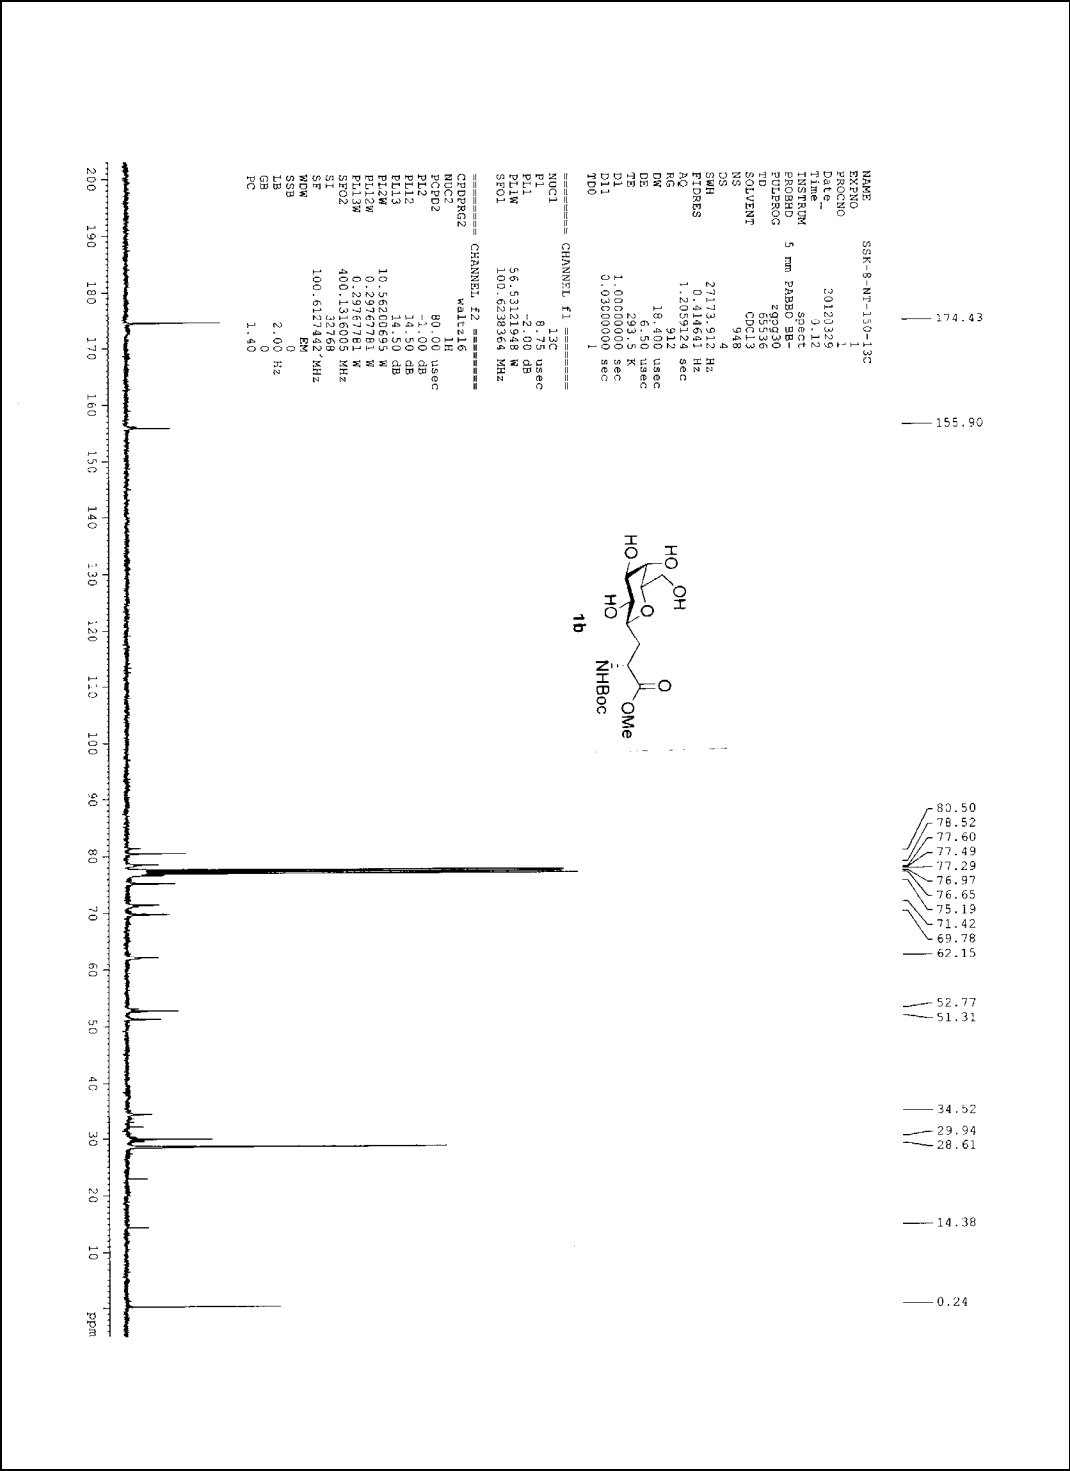

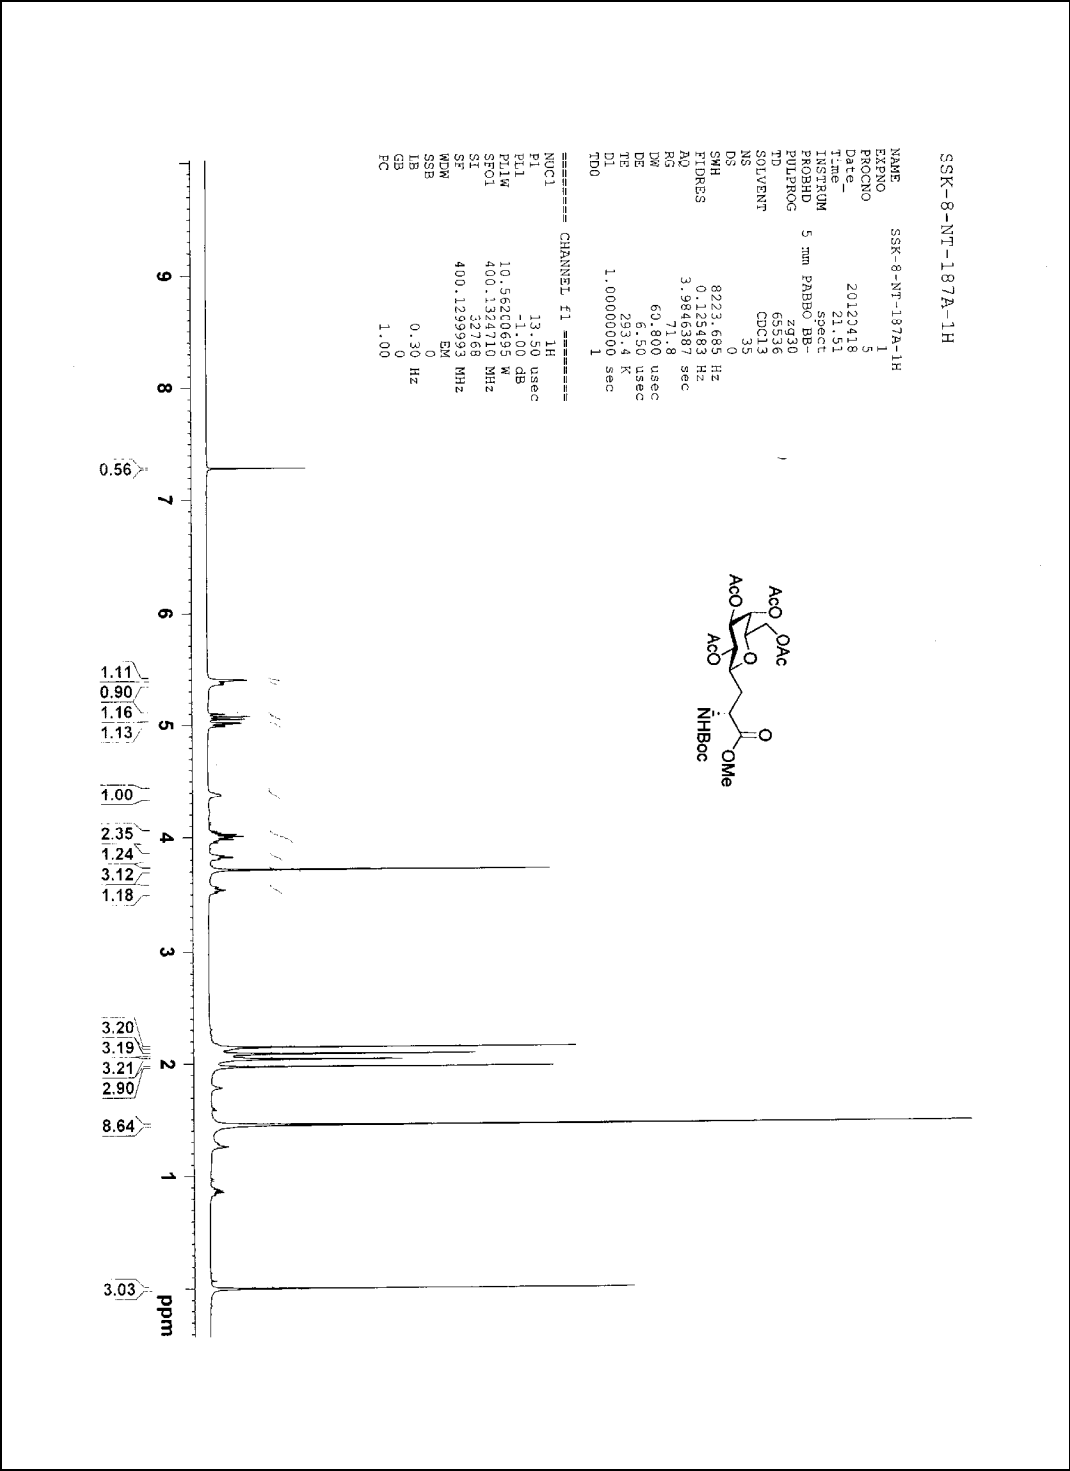

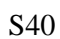

Supplement: c2ob26078f.pdf [file c2ob26078f.pdf]
